# Supplementary material for: Discovery of new pyridine-quinoline hybrids as competitive and non-competitive PIM-1 kinase inhibitors with apoptosis induction and caspase 3/7 activation capabilities
Source: PubMed Central journal article supplement (PMC9848351; doi:10.1080/14756366.2022.2152810), 2023-01-11
Supplement: IENZ_A_2152810_SM9547.pdf [file IENZ_A_2152810_SM9547.pdf]

# Discovery of New Pyridine-Quinoline Hybrids as Competitive and Non-competitive PIM-1 Kinase Inhibitors with Apoptosis Induction and caspase 3/7 activation capabilities

Mostafa M. M. El-Miligy<sup>1\*</sup>, Marwa E. Abdelaziz<sup>1\*</sup>, Salwa M. Fahmy<sup>1</sup>, Tamer M. Ibrahim<sup>3</sup>,  
Marwa M. Abu-Serie<sup>2</sup>, Mona A. Mahran<sup>1</sup>, Aly A. Hazzaa<sup>1</sup>

<sup>1</sup>Pharmaceutical Chemistry Department, Faculty of Pharmacy, Alexandria University, Alexandria 21521, Egypt

<sup>2</sup>Medical Biotechnology Department, Genetic Engineering and Biotechnology Research Institute (GEBRI), City of Scientific Research and Technological Applications (SRTA-City), Alexandria 21934, Egypt

<sup>3</sup>Department of Pharmaceutical Chemistry, Faculty of Pharmacy, Kafrelsheikh University, Kafrelsheikh 33516, Egypt

## Scheme 1:

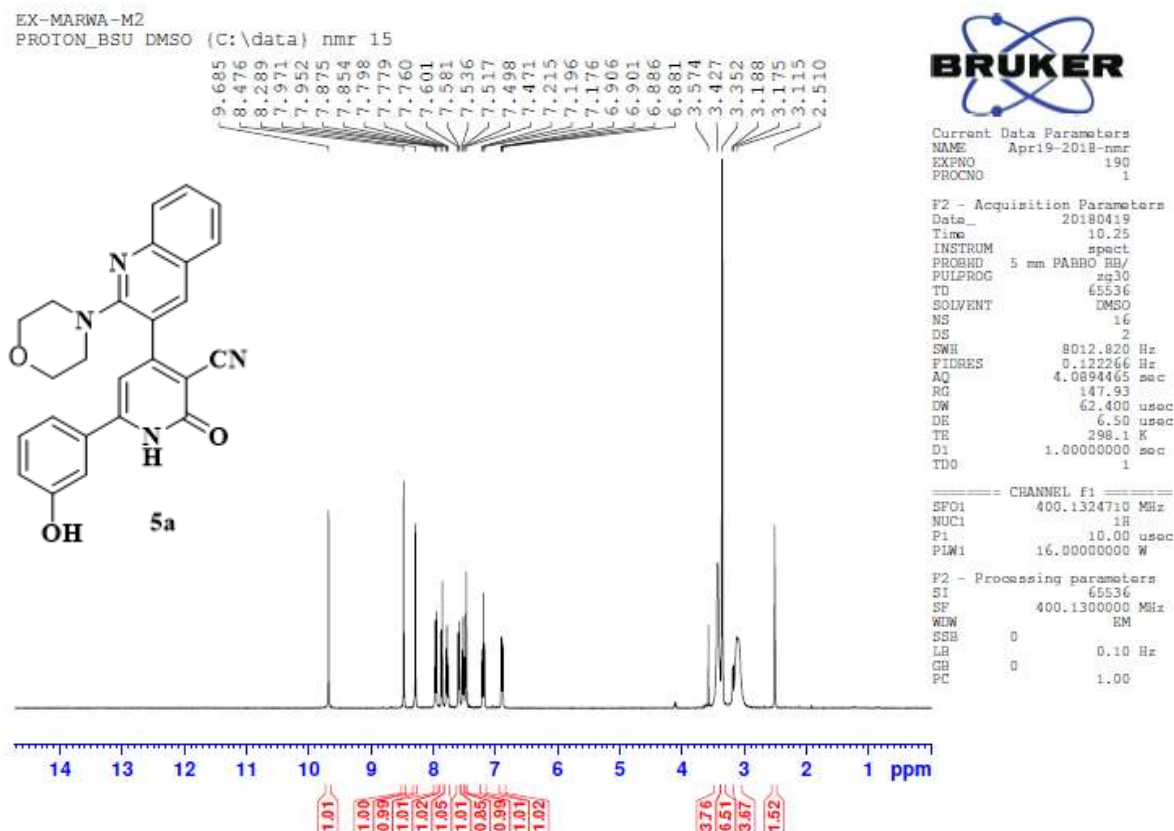

<sup>1</sup>H-NMR spectra of compound 5a

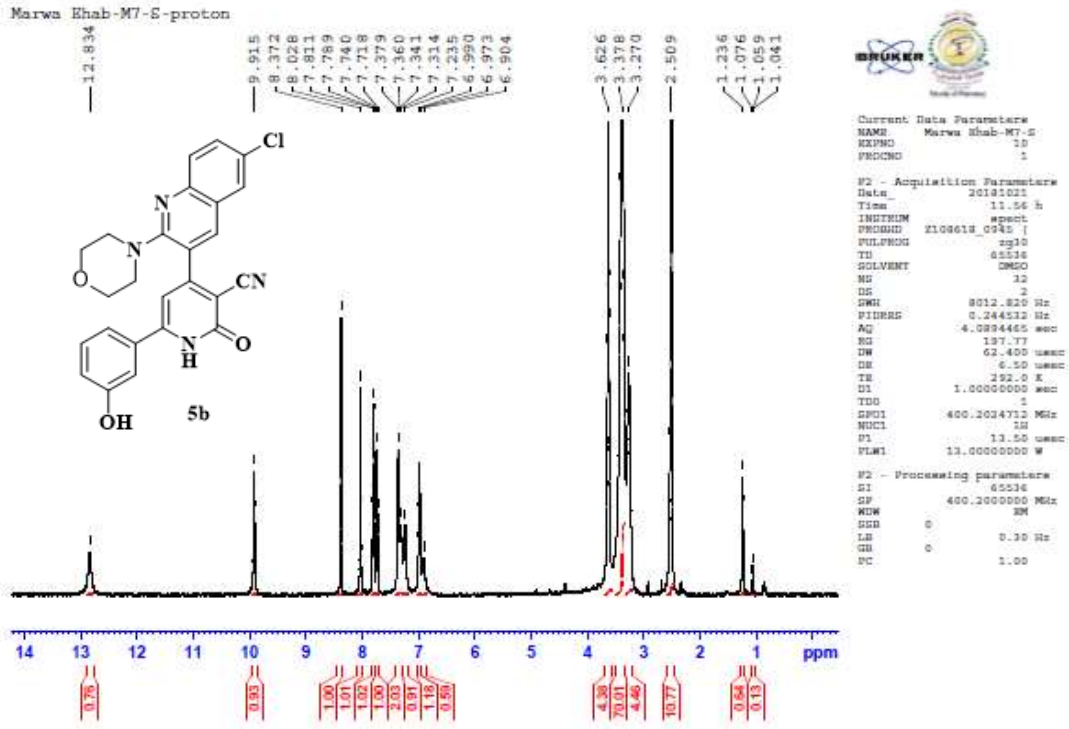

$^1\text{H}$ -NMR spectra of compound 5b

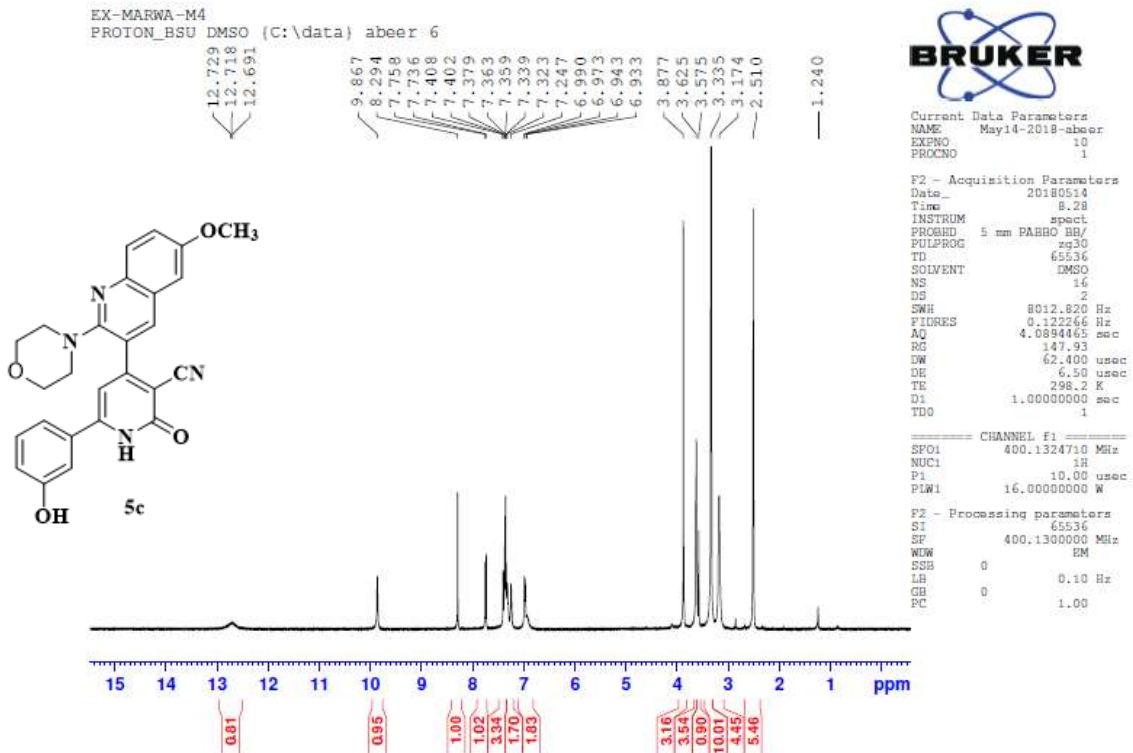

$^1\text{H}$ -NMR spectra of compound 5c

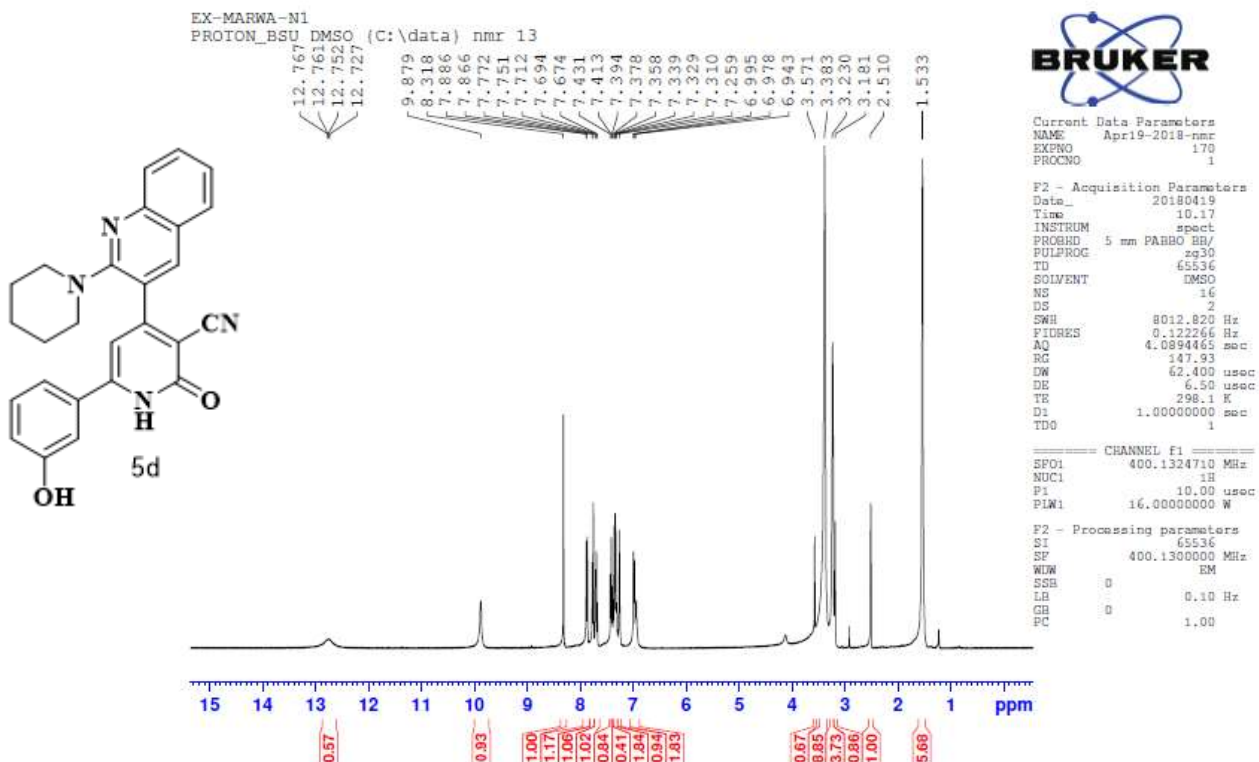

H<sup>1</sup>-NMR spectra of compound 5d

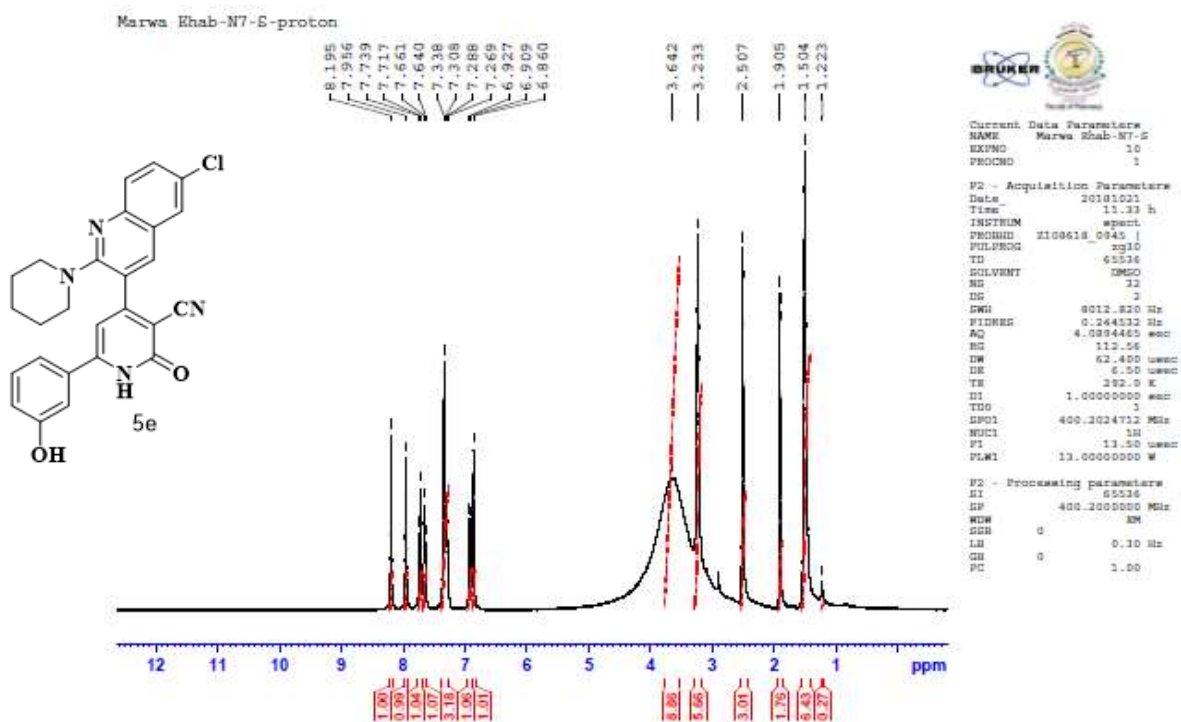

H<sup>1</sup>-NMR spectra of compound 5e

EX-MARWA-N4  
 PROTON\_BSU DMSO (C:\data) nmr 14

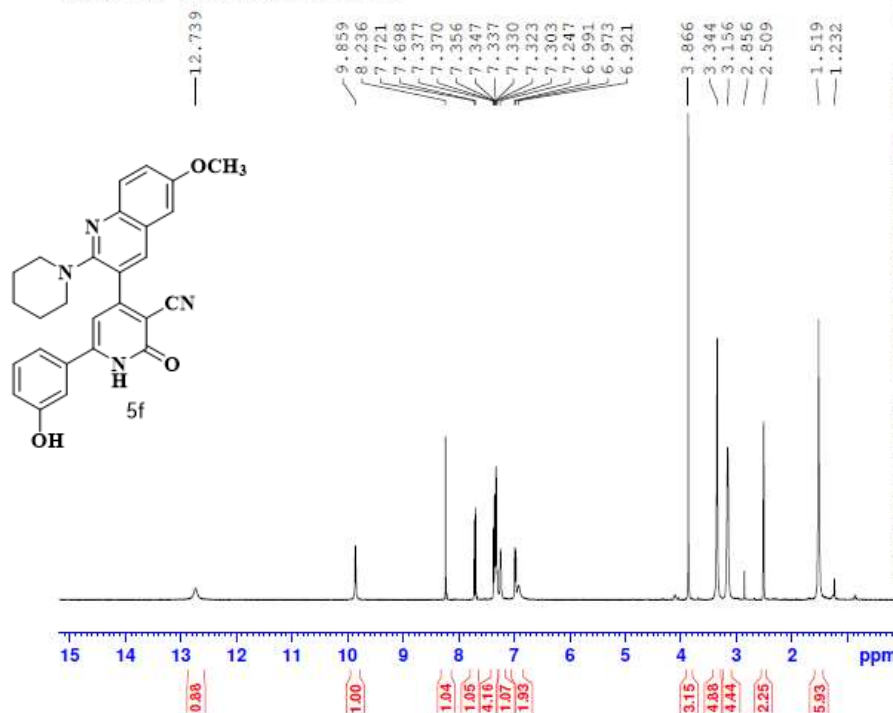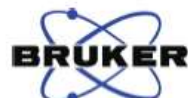

Current Data Parameters  
 NAME Apr19-2018-nmr  
 EXPNO 180  
 PROCNO 1

F2 - Acquisition Parameters  
 Date\_ 20180419  
 Time 10.21  
 INSTRUM spect  
 PROBHD 5 mm PABBO BB/  
 PULPROG zg30  
 TD 65536  
 SOLVENT DMSO  
 NS 16  
 DS 2  
 SWH 8012.820 Hz  
 FIDRES 0.122266 Hz  
 AQ 4.0894465 sec  
 RG 147.93  
 DW 62.400 usec  
 DE 6.50 usec  
 TE 298.2 K  
 D1 1.00000000 sec  
 TDO 1

==== CHANNEL f1 ====  
 SFO1 400.1324710 MHz  
 NUC1 1H  
 P1 10.00 usec  
 PLW1 16.00000000 W

F2 - Processing parameters  
 SI 65536  
 SF 400.1300000 MHz  
 WDW EM  
 SSB 0  
 LB 0.10 Hz  
 GB 0  
 PC 1.00

$^1\text{H}$ -NMR spectra of compound 5f

EX-MARWA-M2  
 PROTON\_BSU DMSO (C:\data) nmr 15

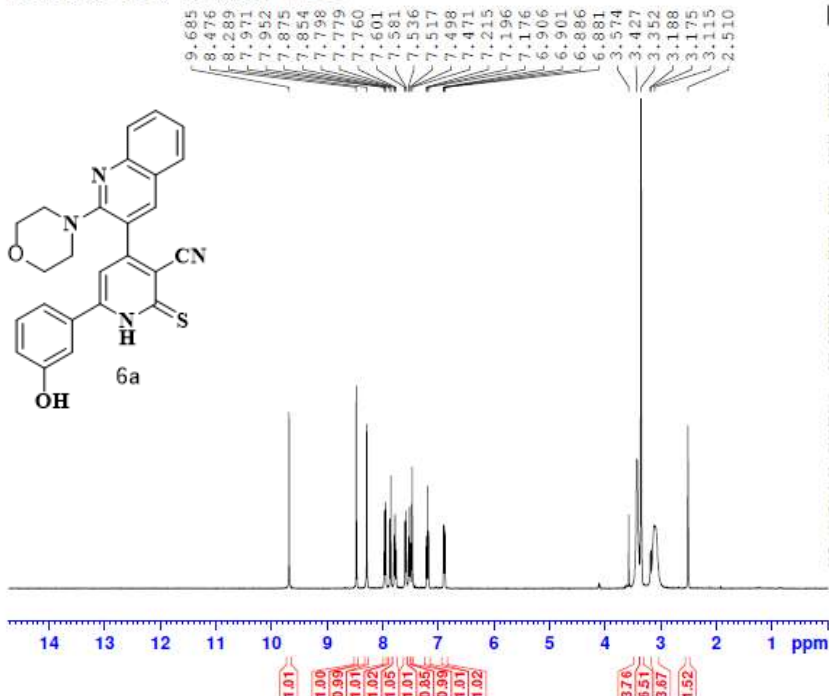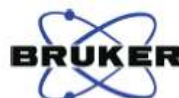

Current Data Parameters  
 NAME Apr19-2018-nmr  
 EXPNO 190  
 PROCNO 1

F2 - Acquisition Parameters  
 Date\_ 20180419  
 Time 10.25  
 INSTRUM spect  
 PROBHD 5 mm PABBO BB/  
 PULPROG zg30  
 TD 65536  
 SOLVENT DMSO  
 NS 16  
 DS 2  
 SWH 8012.820 Hz  
 FIDRES 0.122266 Hz  
 AQ 4.0894465 sec  
 RG 147.93  
 DW 62.400 usec  
 DE 6.50 usec  
 TE 298.1 K  
 D1 1.00000000 sec  
 TDO 1

==== CHANNEL f1 ====  
 SFO1 400.1324710 MHz  
 NUC1 1H  
 P1 10.00 usec  
 PLW1 16.00000000 W

F2 - Processing parameters  
 SI 65536  
 SF 400.1300000 MHz  
 WDW EM  
 SSB 0  
 LB 0.10 Hz  
 GB 0  
 PC 1.00

$^1\text{H}$ -NMR spectra of compound 6a

|                        |                      |                   |                                                   |                        |                      |
|------------------------|----------------------|-------------------|---------------------------------------------------|------------------------|----------------------|
| Acquisition Time (sec) | 4.0894               | Comment           | Marwa Ehab-M8-AS-proton                           | Date                   | 03 Jun 2019 10:46:56 |
| Date Stamp             | 03 Jun 2019 10:46:56 | File Name         | D:\PHD\NMR\Scheme 1\Marwa Ehab-M8-AS-proton10.fid | Origin                 | spect                |
| Frequency (MHz)        | 400.20               | Nucleus           | 1H                                                | Number of Transients   | 16                   |
| Original Points Count  | 32768                | Owner             | nmr                                               | Points Count           | 32768                |
| Receiver Gain          | 158.72               | SW(cyclical) (Hz) | 8012.82                                           | Solvent                | DMSO-d6              |
| Spectrum Type          | STANDARD             | Sweep Width (Hz)  | 8012.58                                           | Temperature (degree C) | 19.903               |
|                        |                      |                   |                                                   | Pulse Sequence         | zg30                 |
|                        |                      |                   |                                                   | Spectrum Offset (Hz)   | 2471.2351            |

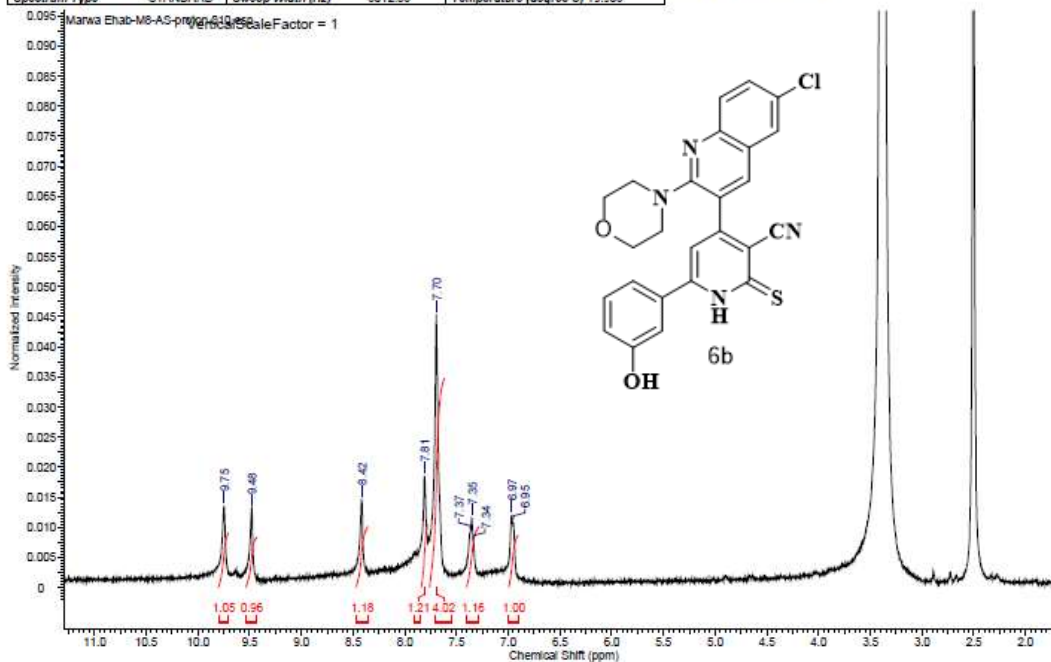

### $^1\text{H}$ -NMR spectra of compound 6b

EX-MARWA-M4  
PROTON\_BSU DMSO (C:\data) aberer 6

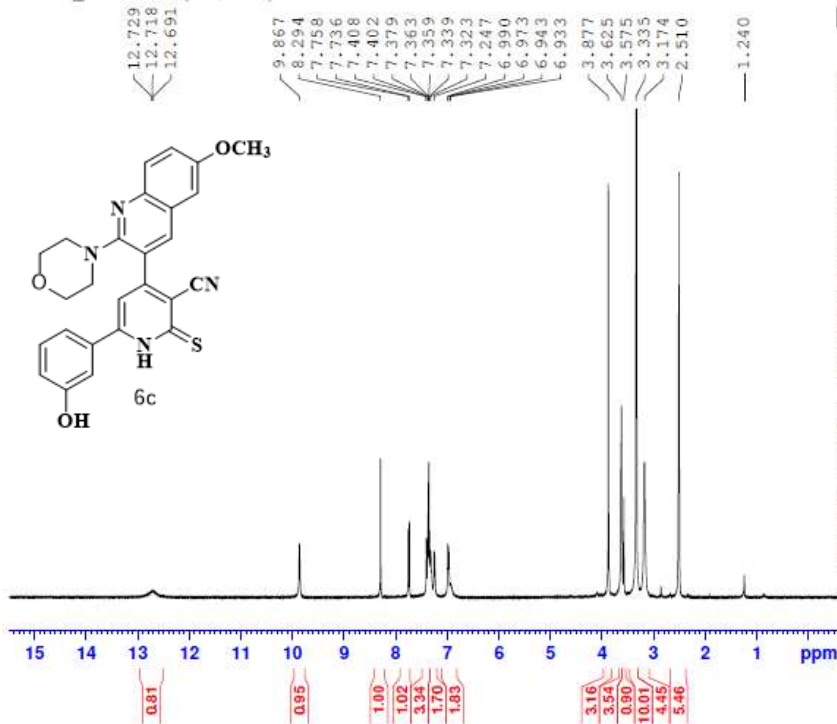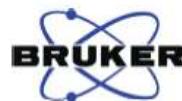

Current Data Parameters  
NAME: May14-2018-aberer  
EXPO: 10  
PROCNO: 1

F2 - Acquisition Parameters  
Date\_: 20180514  
Time: 8.28  
INSTRUM: spect  
PROBHD: 5 mm PABBO BB/  
PULPROG: zg30  
TD: 65536  
SOLVENT: DMSO  
NS: 16  
DS: 2  
SWH: 8012.820 Hz  
FIDRES: 0.122266 Hz  
AQ: 4.0894465 sec  
RG: 347.93  
DW: 62.400 usec  
DE: 6.50 usec  
TE: 298.2 K  
D1: 1.00000000 sec  
TD0: 1

==== CHANNEL f1 =====  
SFO1: 400.1324710 MHz  
NUC1: 1H  
P1: 10.00 usec  
PIW1: 16.00000000 W  
F2 - Processing parameters  
SI: 65536  
SF: 400.1300000 MHz  
WDW: EM  
SSB: 0  
LB: 0.10 Hz  
GB: 0  
PC: 1.00

### $^1\text{H}$ -NMR spectra of compound 6c

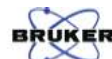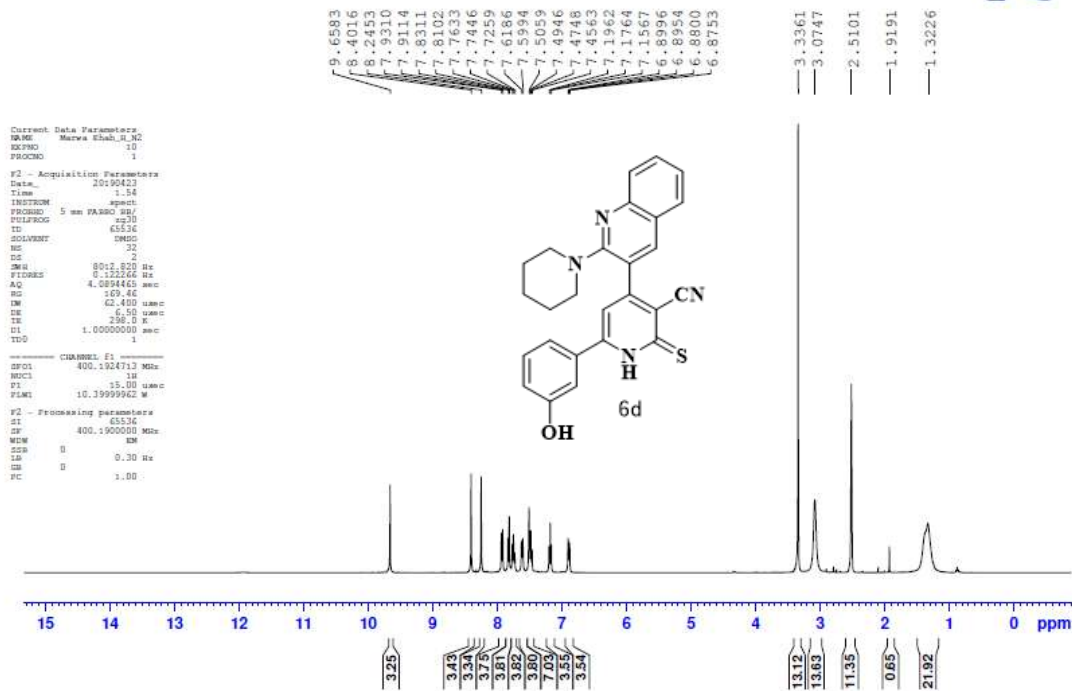

<sup>1</sup>H-NMR spectra of compound 6d

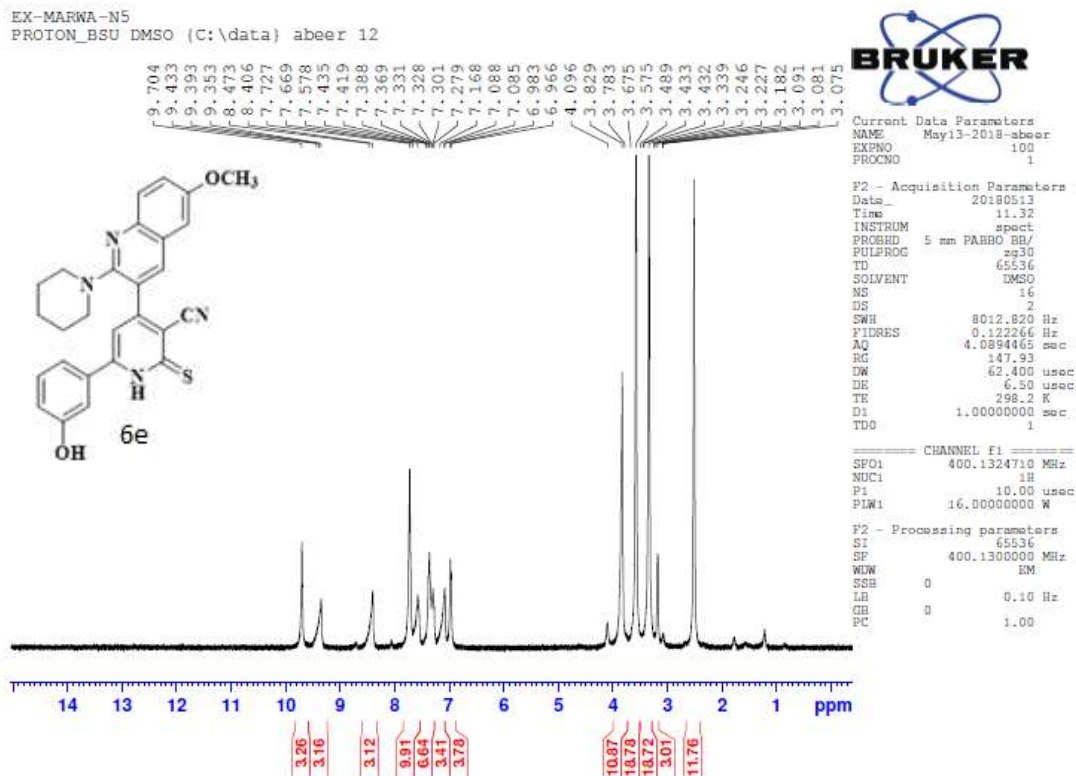

<sup>1</sup>H-NMR spectra of compound 6e

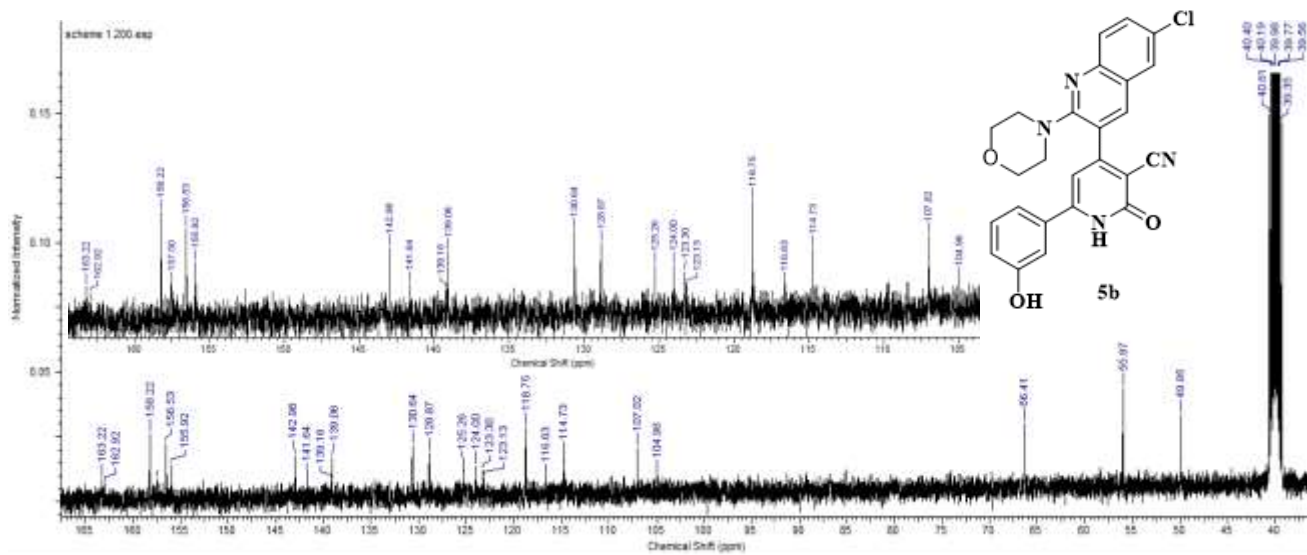

$^{13}\text{C}$ - NMR spectra of compound 5b

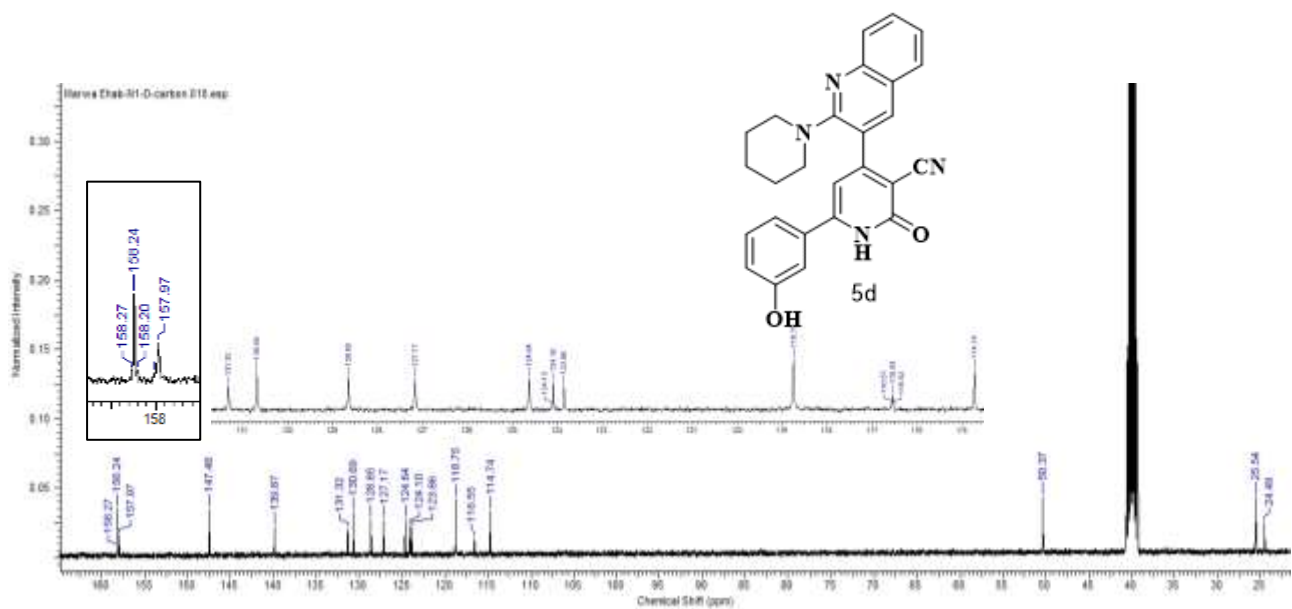

$^{13}\text{C}$ - NMR spectra of compound 5d

EX-MARWA-M5  
 C13-BSU DMSO {C:\data} abeer 16

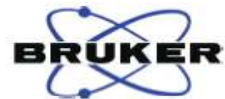

Current Data Parameters  
 NAME May31-2018-abeer  
 EXPNO 350  
 PROCNO 1  
 F2 - Acquisition Parameters  
 Date\_ 20180601  
 Time 17.28  
 INSTRUM spect  
 PROBHD 5 mm PABBO BB/  
 PULPROG zgpg30  
 TD 65536  
 SOLVENT DMSO  
 NS 4000  
 DS 4  
 SWH 24038.461 Hz  
 FIDRES 0.366798 Hz  
 AQ 1.3631488 sec  
 RG 205.44  
 DW 20.800 usec  
 DE 6.50 usec  
 TE 298.1 K  
 D1 2.00000000 sec  
 D11 0.03000000 sec  
 TDO 1

CHANNEL F1  
 SFO1 100.6228293 MHz  
 NUC1 13C  
 P1 10.00 usec  
 PLW1 66.00000000 W  
 CHANNEL F2  
 SFO2 400.1316005 MHz  
 NUC2 1H  
 CPDPRG12 waltz16  
 PCPD2 90.00 usec  
 PLW2 16.00000000 W  
 PLW12 0.21777999 W  
 PLW13 0.17640001 W

F2 - Processing parameters  
 SI 131072  
 SF 100.6127690 MHz  
 EM  
 SSB 0  
 LB 1.00 Hz  
 GB 0  
 PC 1.40

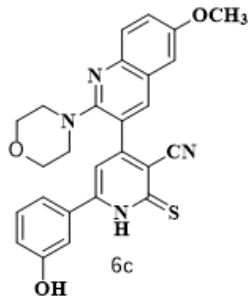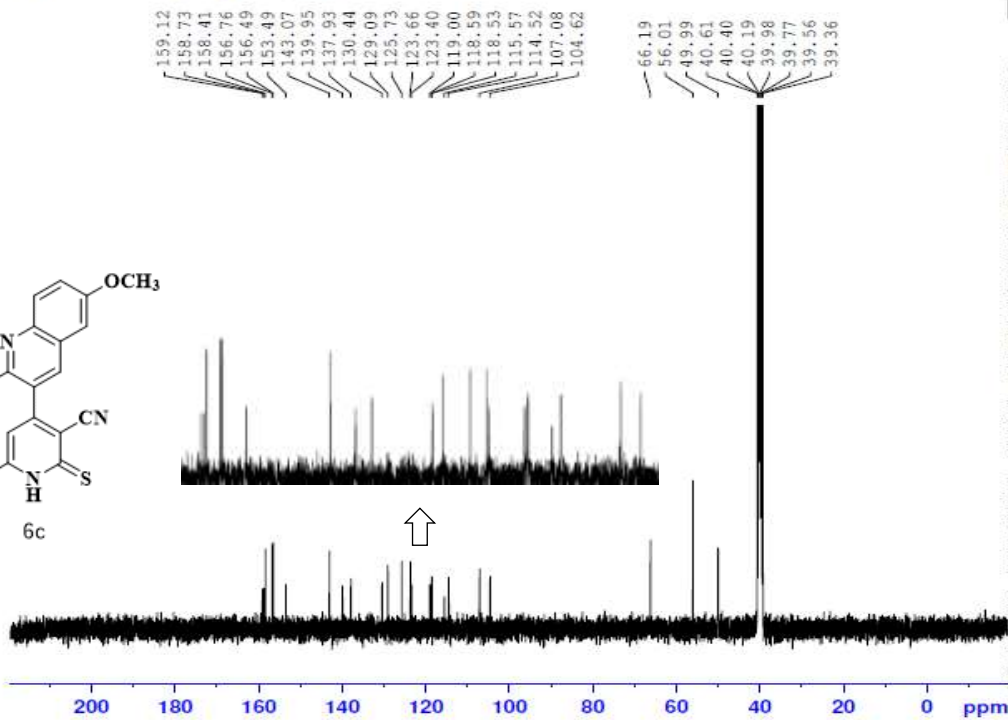

<sup>13</sup>C- NMR spectra of compound 6c

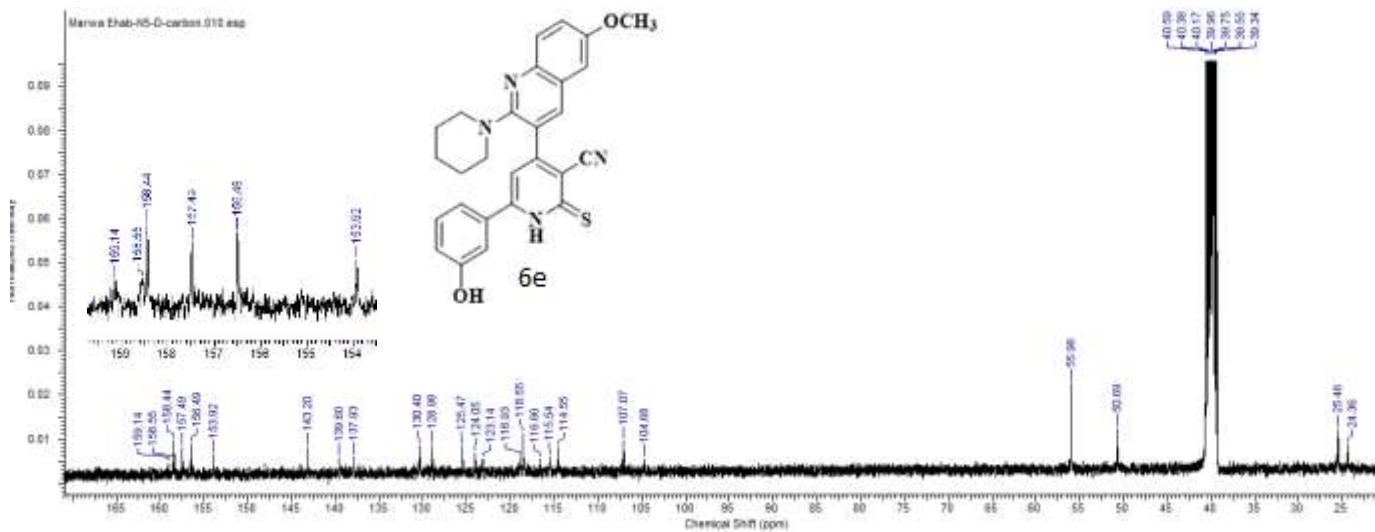

<sup>13</sup>C- NMR spectra of compound 6e



marwa-ehab-m7\_181215122615 #294 RT: 4.94 AV: 1 NL: 4.55E3  
T: {0,0} + c EI Full ms [40.00-1000.00]

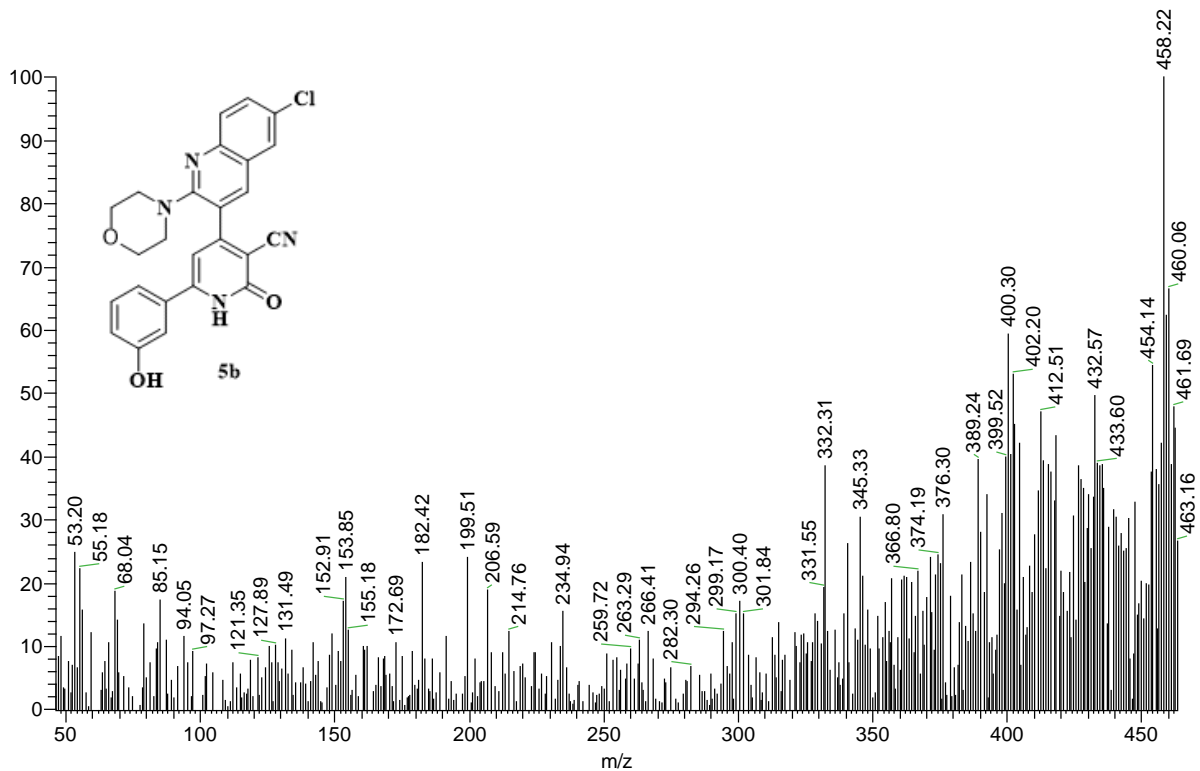

EI/MS spectrum of compound **5b**

marwa-ehab-n7 #279 RT: 4.69 AV: 1 NL: 3.90E4  
T: {0,0} + c EI Full ms [40.00-1000.00]

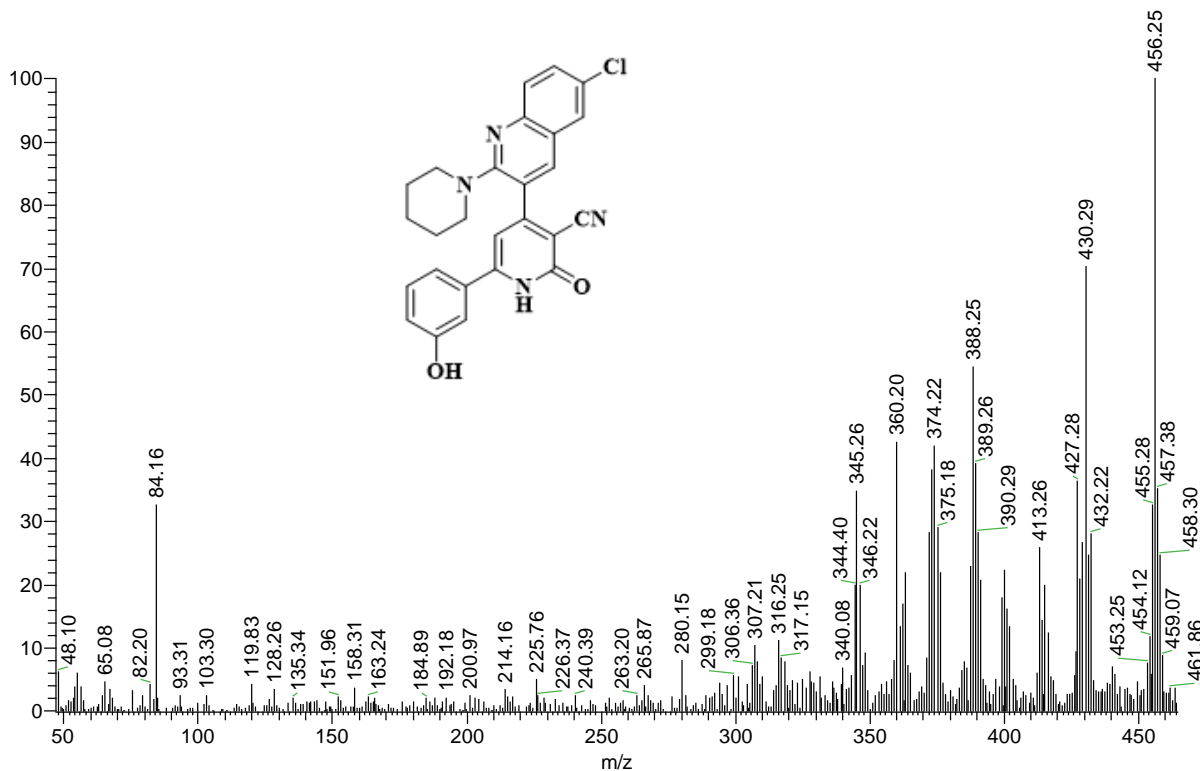

EI/MS spectrum of compound **5e**

marwa-ehab-m8 #167 RT: 2.81 AV: 1 NL: 2.17E3  
T: {0,0} + c EI Full ms [40.00-1000.00]

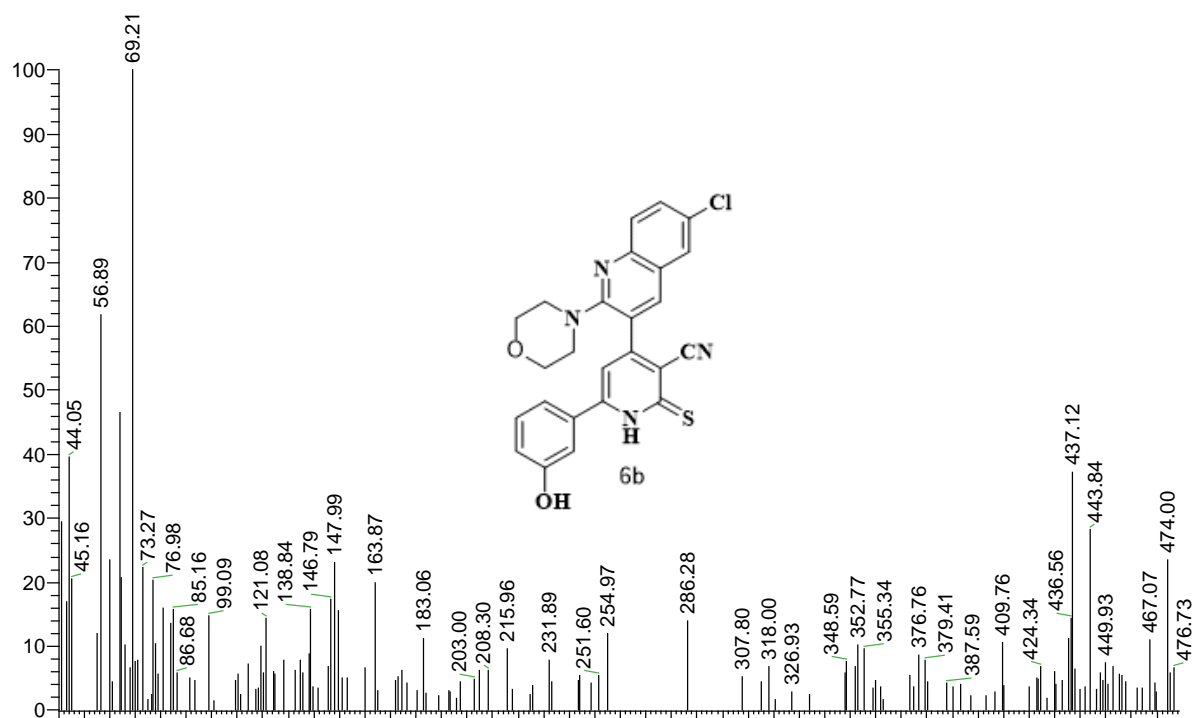

EI/MS spectrum of compound 6b

marwa-ehab-n5 #195 RT: 3.28 AV: 1 SB: 2 4.40, 4.40 NL: 4.52E2  
T: {0,0} + c EI Full ms [40.00-1000.00]

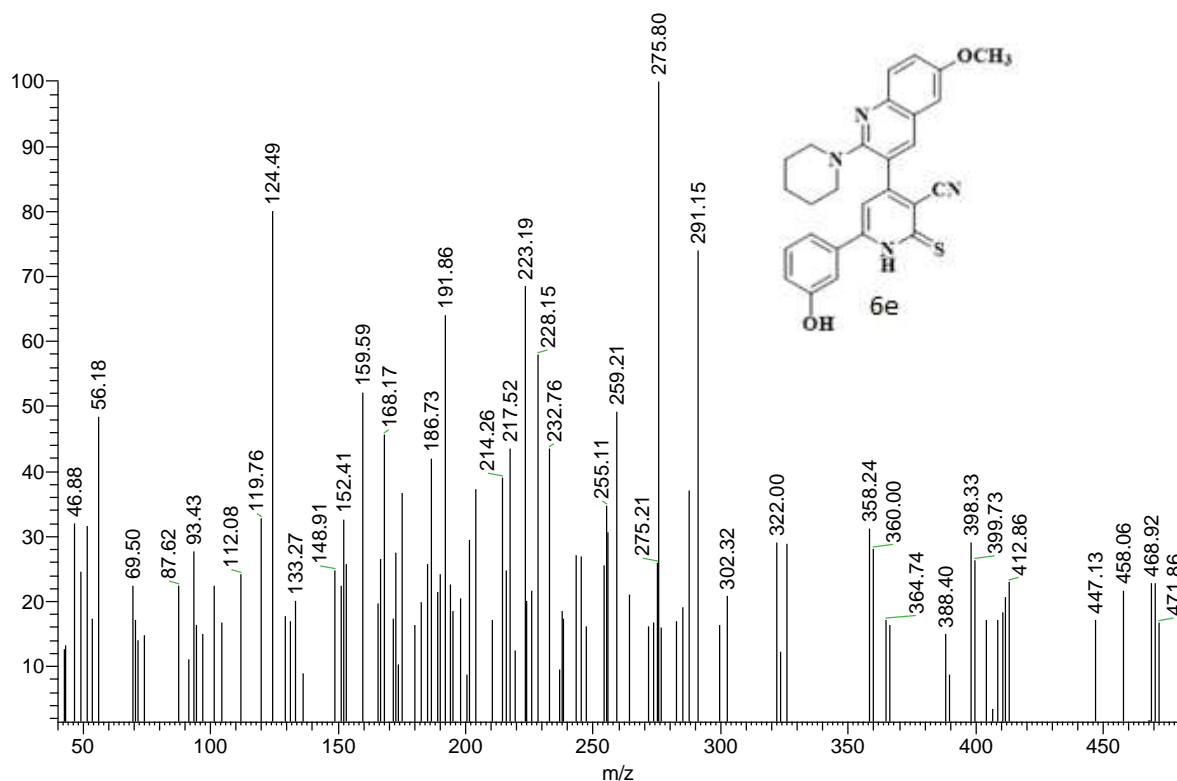

EI/MS spectrum of compound 6e

**Al-Azhar University**  
**The Regional Center for Mycology and Biotechnology**

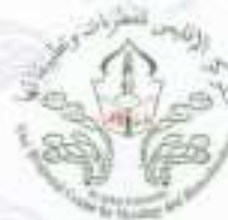

**Requester Data:**

**Name:** Dr. Marwa Ehab Mohamed  
**Authority:** Faculty of Pharmacy,  
Alexandria University

**Sample Data:**

Eleven samples had been submitted for elemental analysis.

**Analysis Report:**

| Sample Code       | C%    | H%   | N%    |
|-------------------|-------|------|-------|
| CH <sub>2</sub>   | 68.01 | 3.43 | 7.79  |
| CH <sub>3</sub>   | 68.56 | 3.88 | 7.42  |
| M <sub>1</sub> 5a | 71.02 | 4.89 | 13.43 |
| M <sub>4</sub> 5c | 68.94 | 5.12 | 12.59 |
| M <sub>7</sub> 5b | 65.27 | 4.28 | 12.47 |
| N <sub>1</sub> 5d | 74.19 | 5.39 | 13.53 |
| N <sub>4</sub> 5f | 71.90 | 5.26 | 12.56 |
| N <sub>7</sub> 5e | 68.60 | 4.80 | 12.49 |
| O <sub>2</sub>    | 70.69 | 3.84 | 11.97 |
| O <sub>5</sub>    | 68.80 | 3.85 | 10.79 |
| O <sub>8</sub>    | 64.89 | 3.32 | 10.85 |

**INVESTIGATOR**

**DIRECTOR**

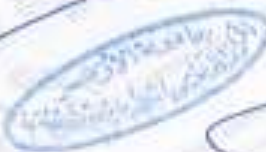

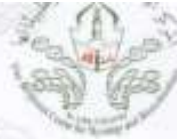

**Requester Data:**

**Name:** Dr. Marwa Ehab Mohamed  
**Authority:** Faculty of Pharmacy,  
 Alexandria University

**Sample Data:**

Twenty samples had been submitted for elemental analysis.

**Analysis Report:**

| Sample Code        | C%    | H%   | N%    |
|--------------------|-------|------|-------|
| M <sub>1</sub> eN  | 68.71 | 5.24 | 19.38 |
| M <sub>1</sub> J   | 71.09 | 5.21 | 12.96 |
| M <sub>2</sub> 6a  | 68.42 | 4.75 | 12.94 |
| M <sub>3</sub> e   | 70.38 | 5.84 | 11.50 |
| M <sub>4</sub> k   | 69.87 | 5.68 | 11.79 |
| M <sub>5</sub> 6c  | 66.59 | 4.83 | 11.75 |
| M <sub>7</sub> a   | 64.58 | 4.59 | 11.34 |
| M <sub>7</sub> b   | 62.96 | 4.13 | 11.06 |
| M <sub>7</sub> e   | 67.40 | 5.28 | 11.37 |
| M <sub>7</sub> e N | 63.26 | 4.69 | 17.58 |
| M <sub>7</sub> f   | 63.44 | 4.21 | 11.39 |
| M <sub>7</sub> h   | 66.81 | 4.62 | 11.94 |
| M <sub>7</sub> J   | 66.26 | 4.69 | 11.72 |
| M <sub>7</sub> k   | 66.49 | 4.88 | 11.69 |
| M <sub>8</sub> 6b  | 63.45 | 4.11 | 11.94 |
| N <sub>2</sub> 6d  | 71.47 | 5.28 | 13.02 |
| N <sub>5</sub> 6f  | 63.43 | 5.34 | 12.13 |
| O <sub>1</sub>     | 66.49 | 4.06 | 15.95 |
| O <sub>4</sub>     | 68.95 | 4.32 | 14.67 |
| O <sub>7</sub>     | 64.71 | 3.19 | 14.62 |

INVESTIGATOR

*M. Ehab*

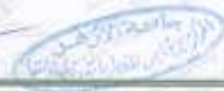

DIRECTOR

*H. Shal*

Scheme 2:

EX-MARWA-M1a  
 PROTON\_BSU DMSO (C:\data) aber 1

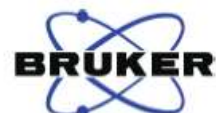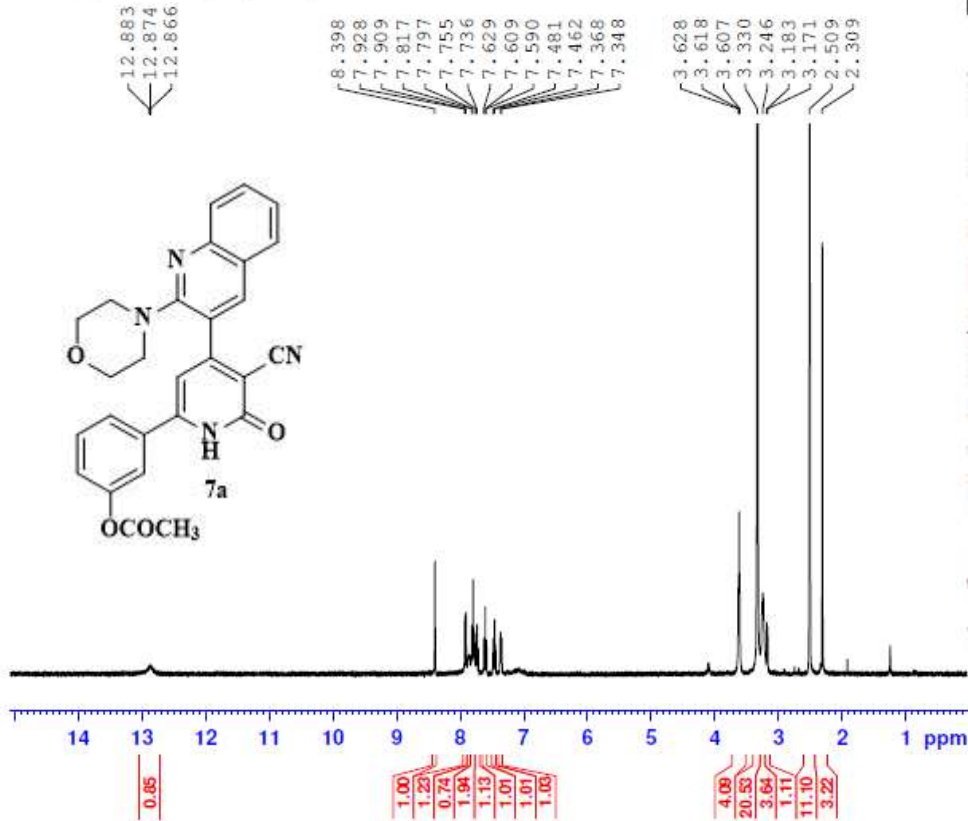

Current Data Parameters  
 NAME May28-2018-aber  
 EXPNO 80  
 PROCNO 1

F2 - Acquisition Parameters  
 Date\_ 20180528  
 Time 10.23  
 INSTRUM spect  
 PROBHD 5 mm PABBO BB/  
 PULPROG zg30  
 TD 65536  
 SOLVENT DMSO  
 NS 16  
 DS 2  
 SWH 8012.820 Hz  
 FIDRES 0.122266 Hz  
 AQ 4.0894465 sec  
 RG 147.93  
 DW 62.400 usec  
 DE 6.50 usec  
 TE 298.1 K  
 DI 1.0000000 sec  
 TDO 1

==== CHANNEL f1 =====  
 SFO1 400.1324710 MHz  
 NUC1 1H  
 P1 10.00 usec  
 PLW1 16.00000000 W

F2 - Processing parameters  
 SI 65536  
 SF 400.1300000 MHz  
 WDW EM  
 SSB 0  
 LB 0.10 Hz  
 GB 0  
 PC 1.00

<sup>1</sup>H-NMR spectra of compound 7a

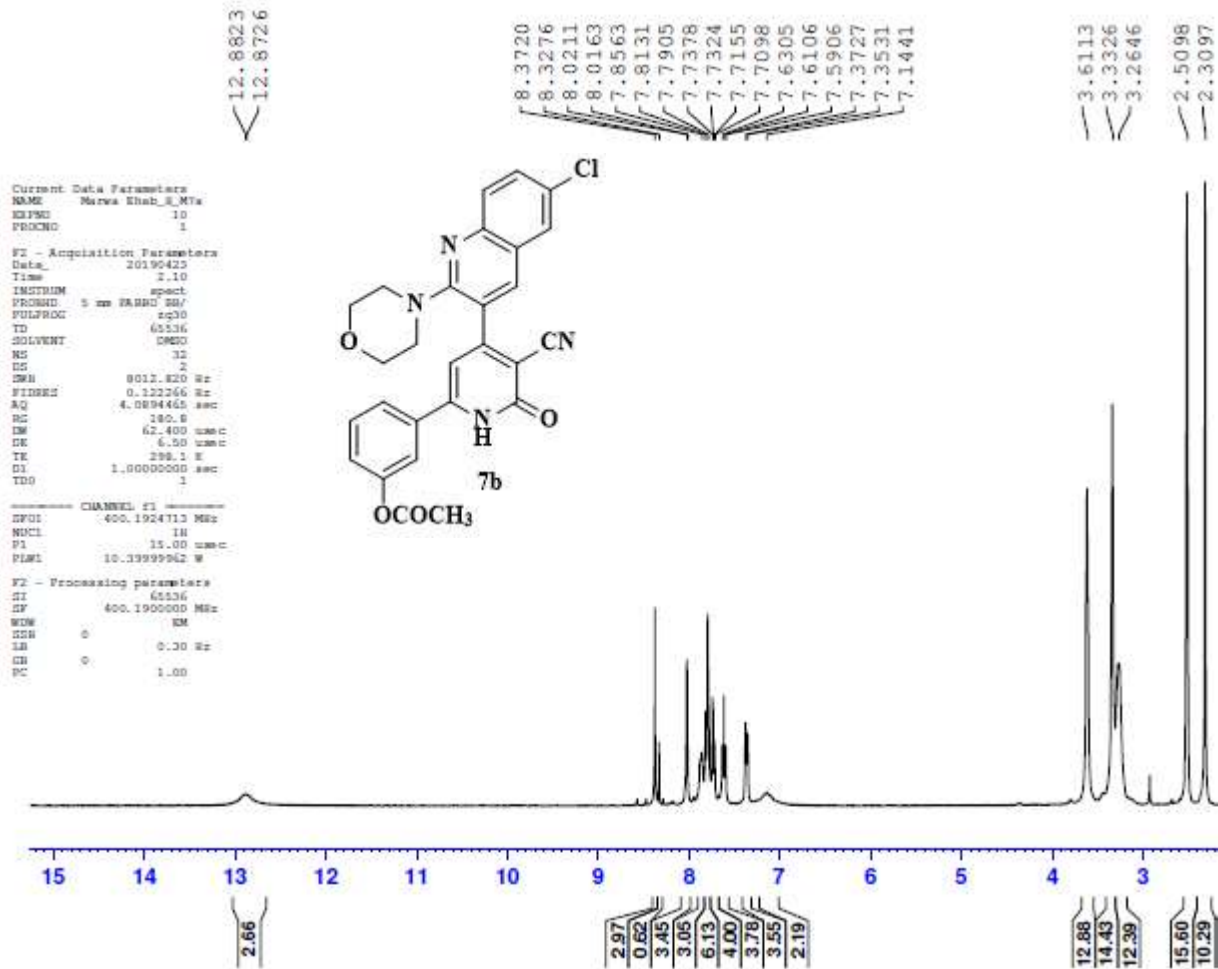

**H<sup>1</sup>-NMR spectra of compound 7b**

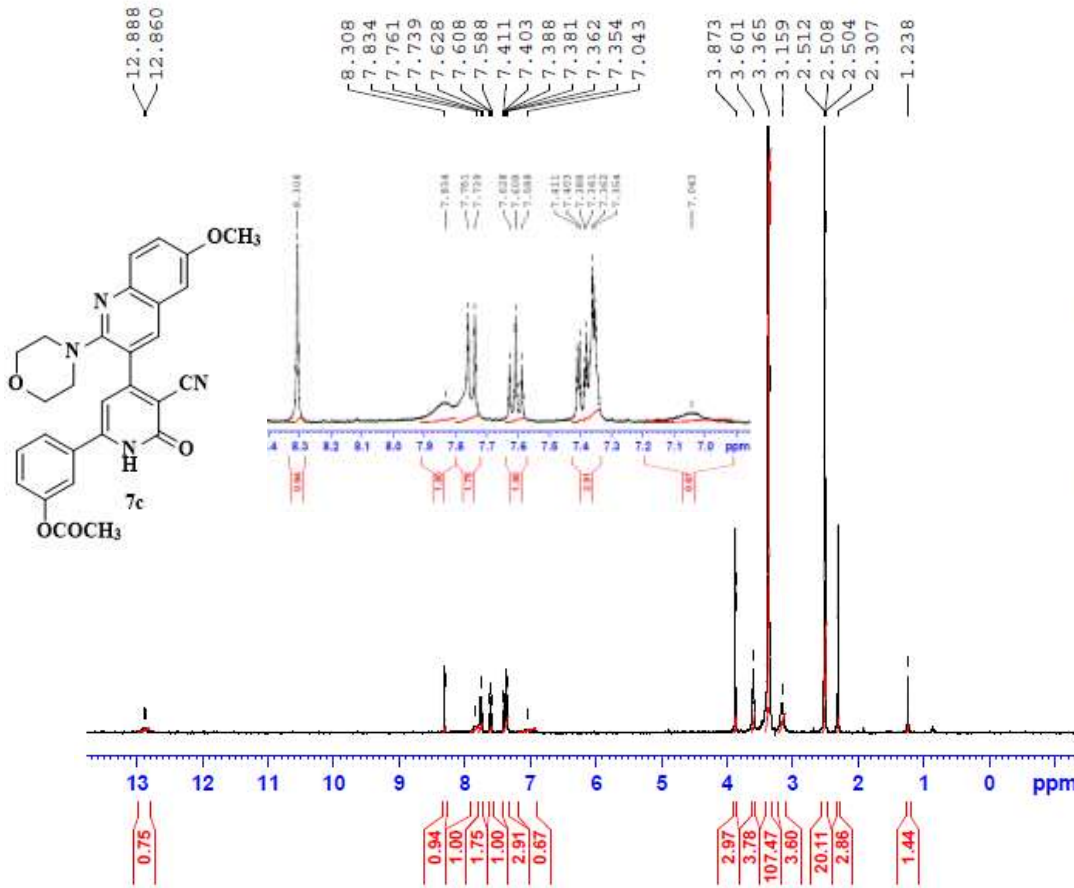

**BRUKER**  
Faculty of Pharmacy

Current Data Parameters  
 NAME Marwa Ehab-M4a-DMSO-Hnmr  
 EXPRNO 10  
 PROCNO 1

F2 - Acquisition Parameters  
 Date 20191005  
 Time 12.45 h  
 INSTRUM spect  
 PROBHD Z108618\_0945 ( )  
 PULPROG zg30  
 TD 65536  
 SOLVENT DMSO  
 NS 16  
 DS 2  
 SWH 8012.820 Hz  
 FIDRES 0.244832 Hz  
 AQ 4.0894465 sec  
 RG 197.77  
 DW 62.400 usec  
 DE 6.50 usec  
 TE 293.4 K  
 D1 1.00000000 sec  
 TDO 1  
 SFO1 400.2024712 MHz  
 NUC1 1H  
 F1 13.50 usec  
 PLM1 13.00000000 W

F2 - Processing parameters  
 S1 65536  
 SF 400.2000000 MHz  
 WDW EM  
 SSB 0  
 LB 0.30 Hz  
 GB 0  
 PC 1.00

**<sup>1</sup>H-NMR spectra of compound 7c**

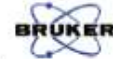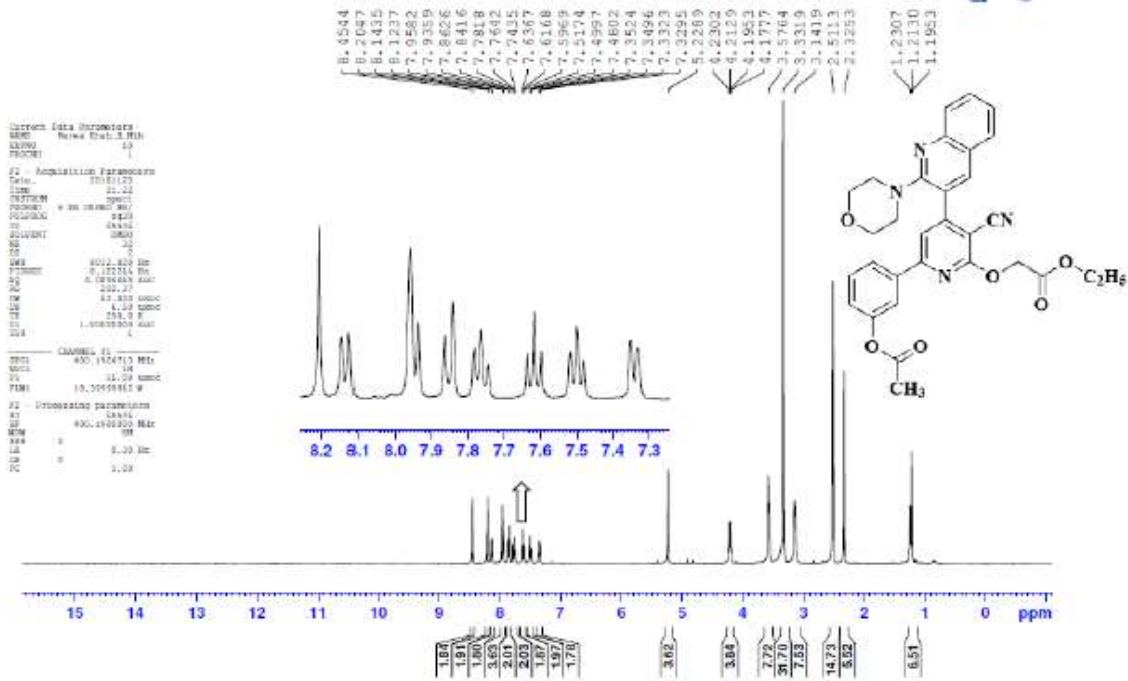

**<sup>1</sup>H-NMR spectra of compound 8a**

Marwa ehab Mlbo -M proton

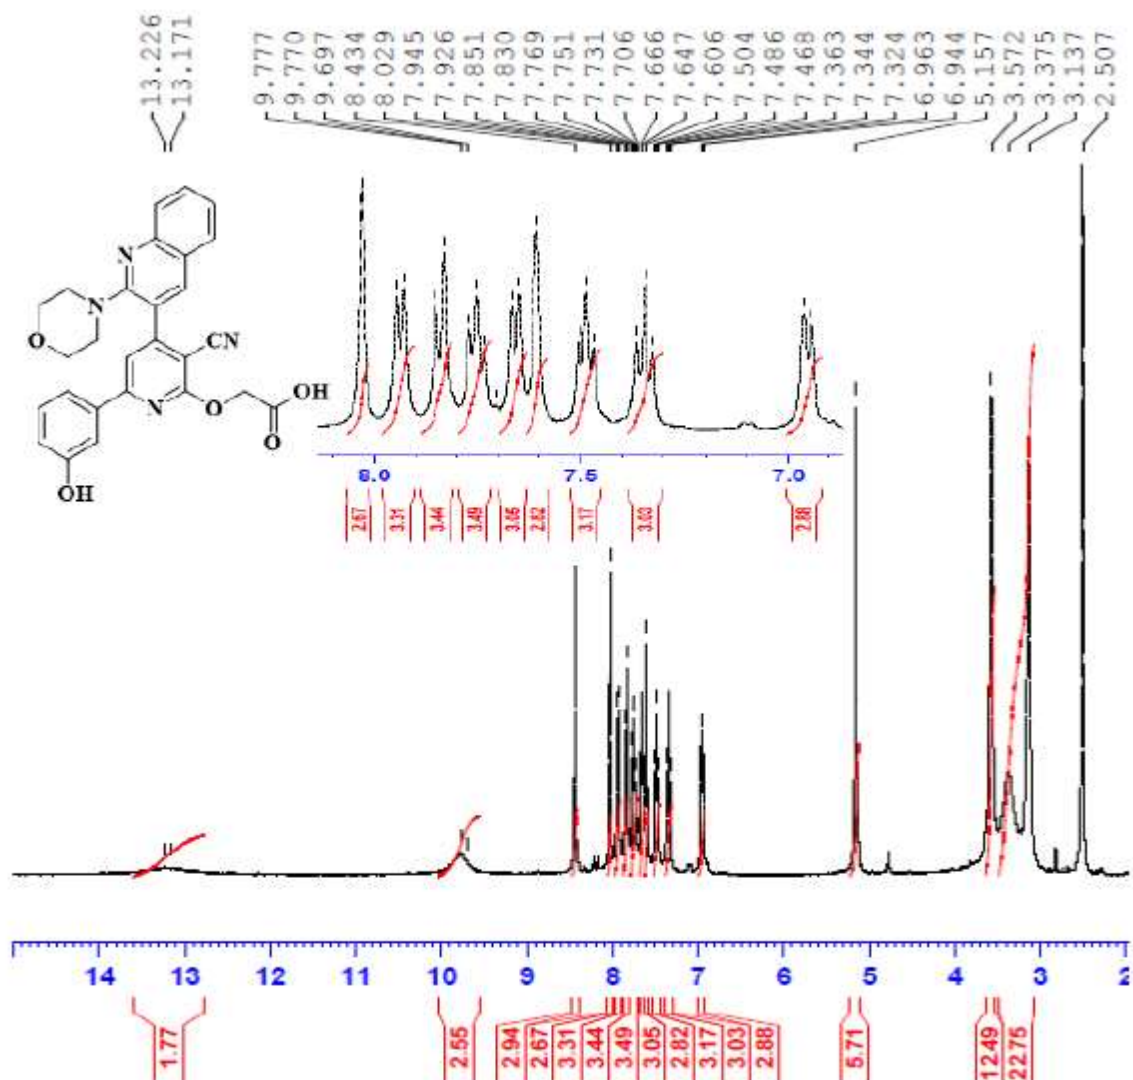

<sup>1</sup>H-NMR spectra of compound 9a



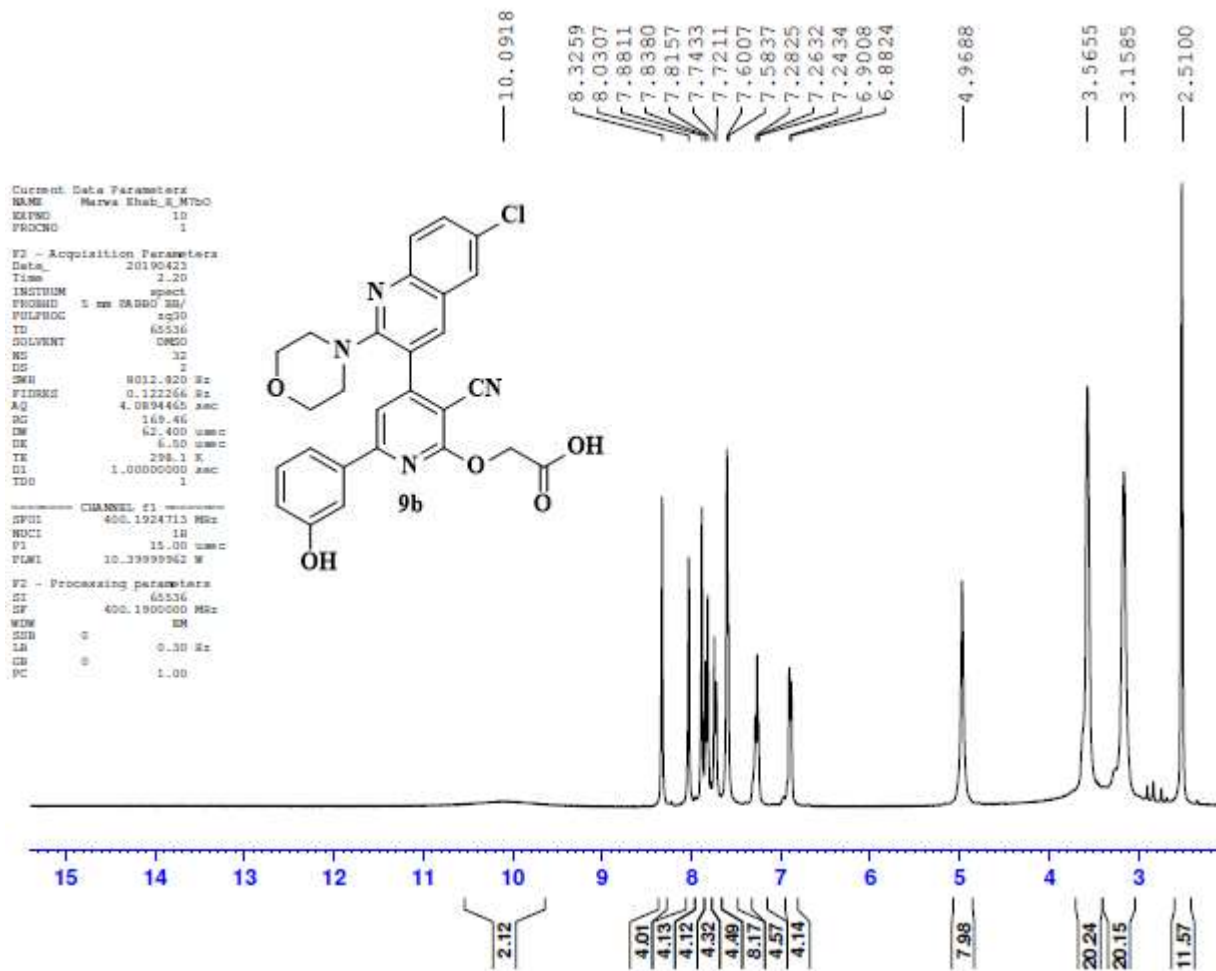

**<sup>1</sup>H-NMR spectra of compound 9b**

Mrwa ehab -M4bo-DMSO-W-proton

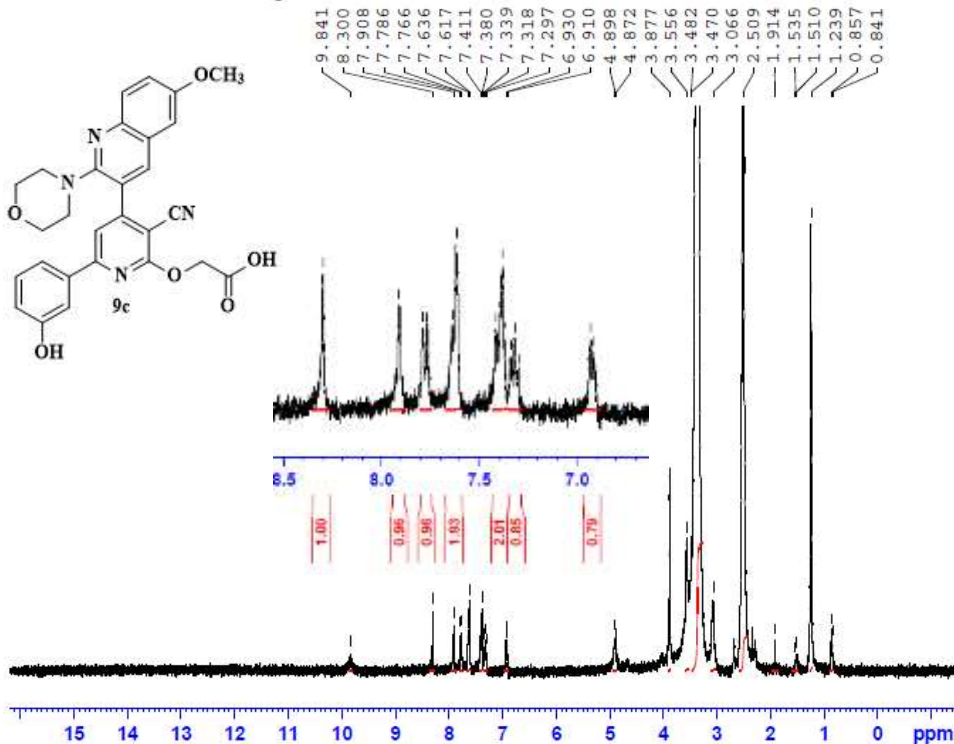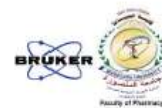

Current Data Parameters  
 NAME Mrwa ehab -M4bo-DMSO-W-proton  
 EXPNO 10  
 PROCNO 1

F2 - Acquisition Parameters  
 Date\_ 20181212  
 Time 12.45 h  
 INSTRUM spect  
 PROBHD 5mm PABBO BBI  
 PULPROG zg30  
 TD 65536  
 SOLVENT DMSO  
 NS 32  
 DS 2  
 SWH 8012.820 Hz  
 FIDRES 0.244332 Hz  
 AQ 4.0894465 sec  
 RG 197.77  
 DW 62.400 usec  
 DE 6.50 usec  
 TE 292.3 K  
 D1 1.00000000 sec  
 SFO1 400.2024113 MHz  
 NUC1 1H  
 P1 13.00 usec  
 PL1 13.00000000 W

F2 - Processing parameters  
 SI 65536  
 SF 400.2000000 MHz  
 MDW EM  
 SSB 0  
 LB 0.30 Hz  
 GB 0  
 PC 1.00

**<sup>1</sup>H-NMR spectra of compound 9c**

Marwa Ehab\_H\_MIF

Microanalytical Unit - FOPCU - NMR laboratory  
[www.pharma.cu.edu.eg](http://www.pharma.cu.edu.eg) [dir-mau.fopcu@pharma.cu.edu.eg](mailto:dir-mau.fopcu@pharma.cu.edu.eg)

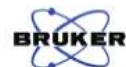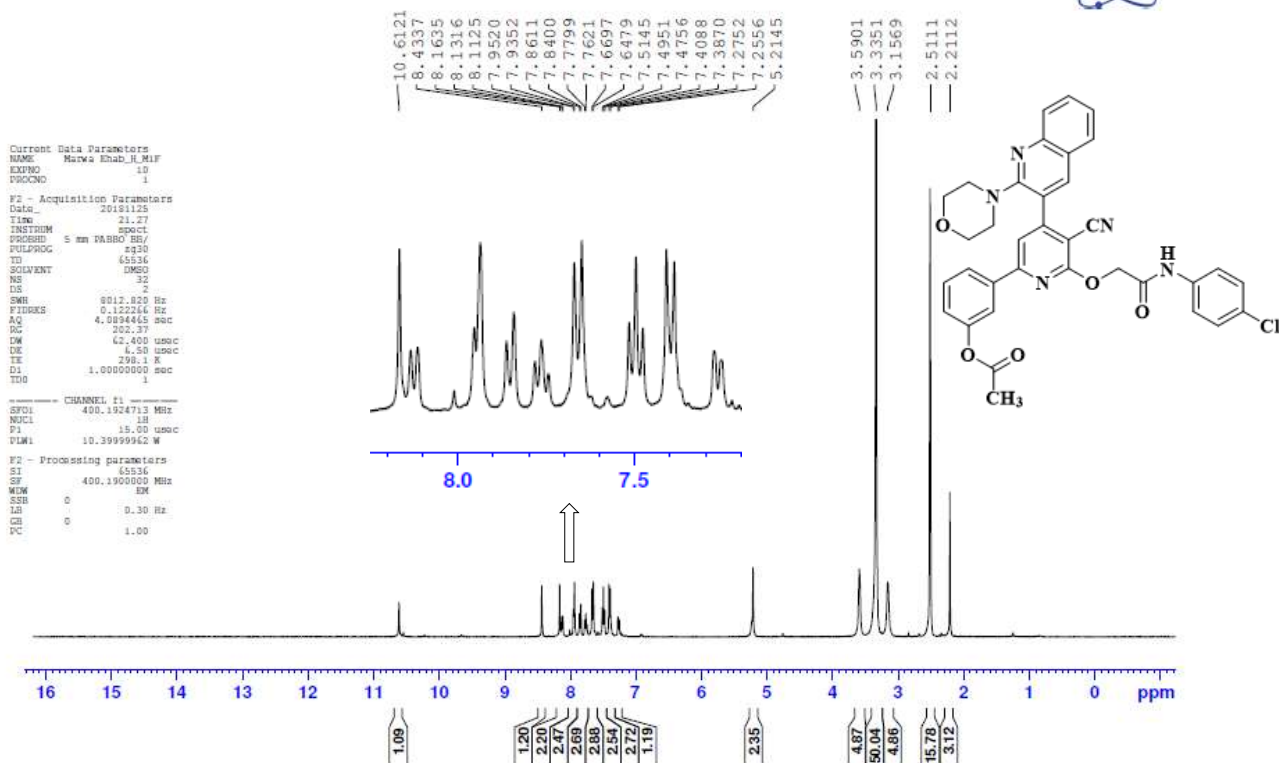

**<sup>1</sup>H-NMR spectra of compound 10b**

marwa Ehab-M4h-proton-WH

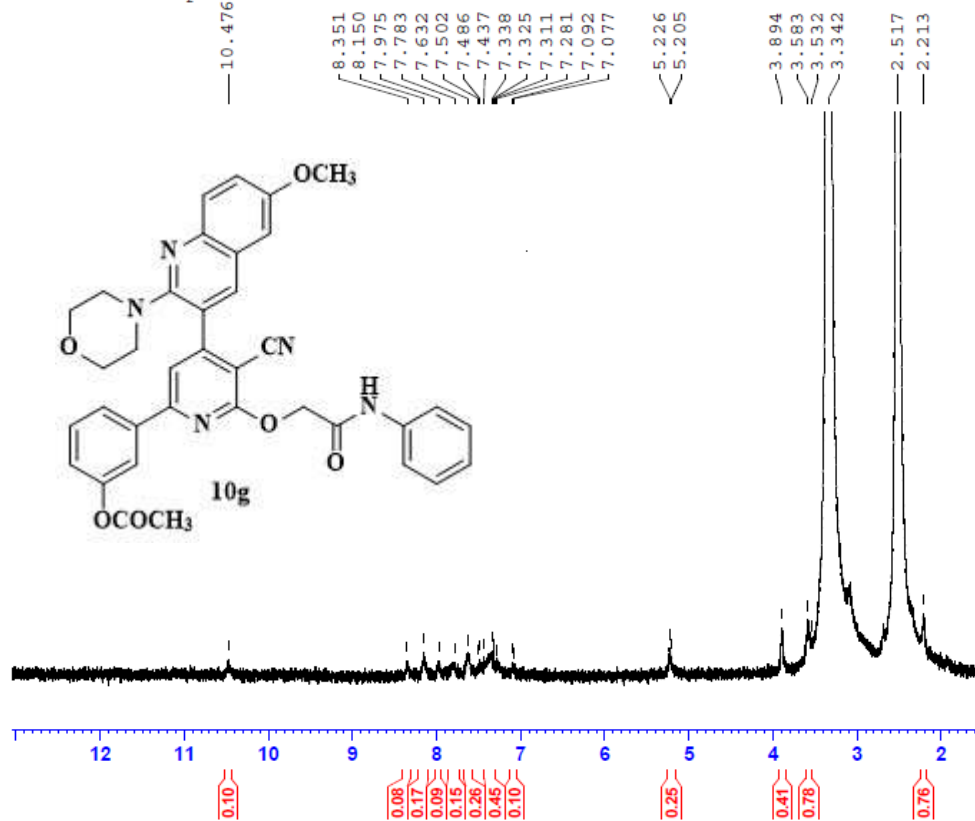

$H^1$ -NMR spectra of compound 10g

marwa Ehab-M79-proton-WH

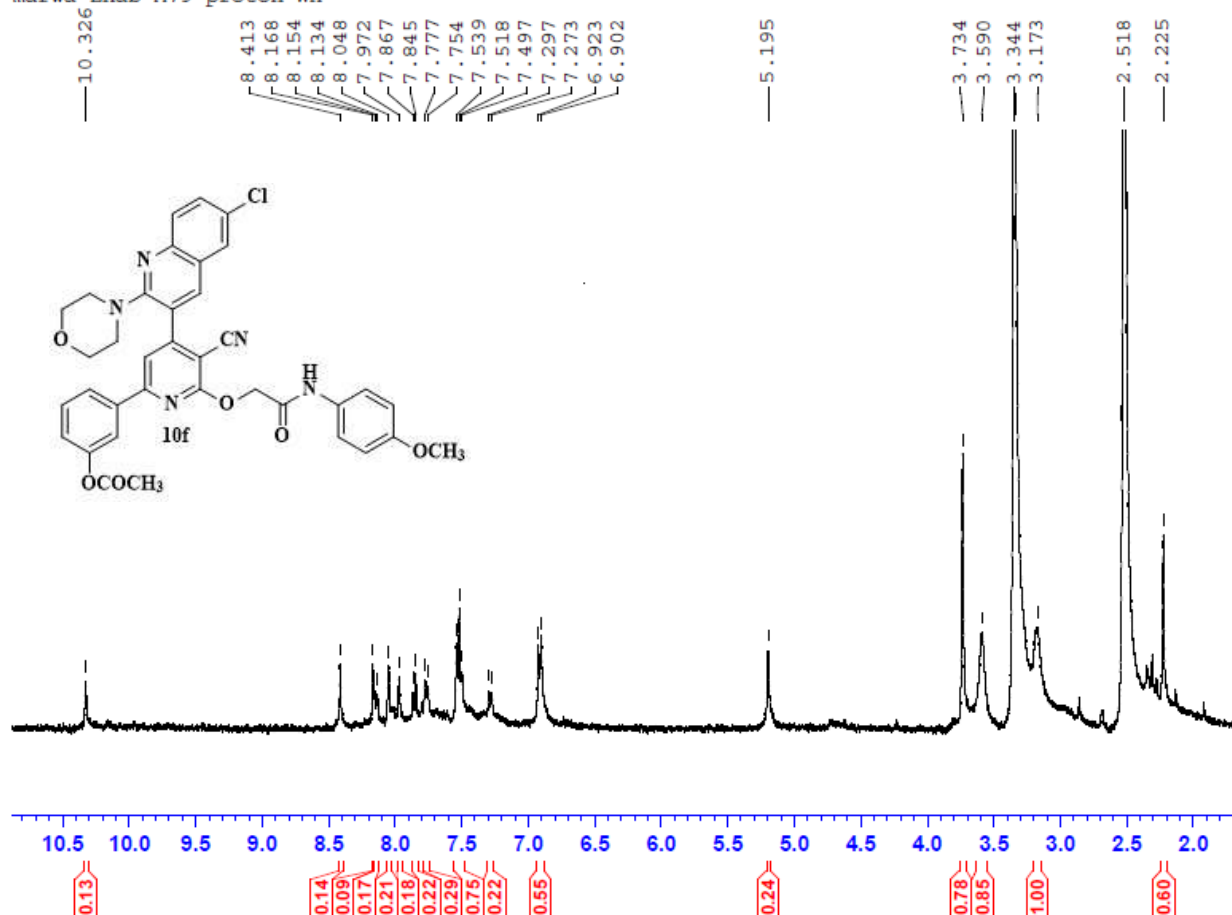

### H<sup>1</sup>-NMR spectra of compound 10f

Marwa ehab MIHo -M proton

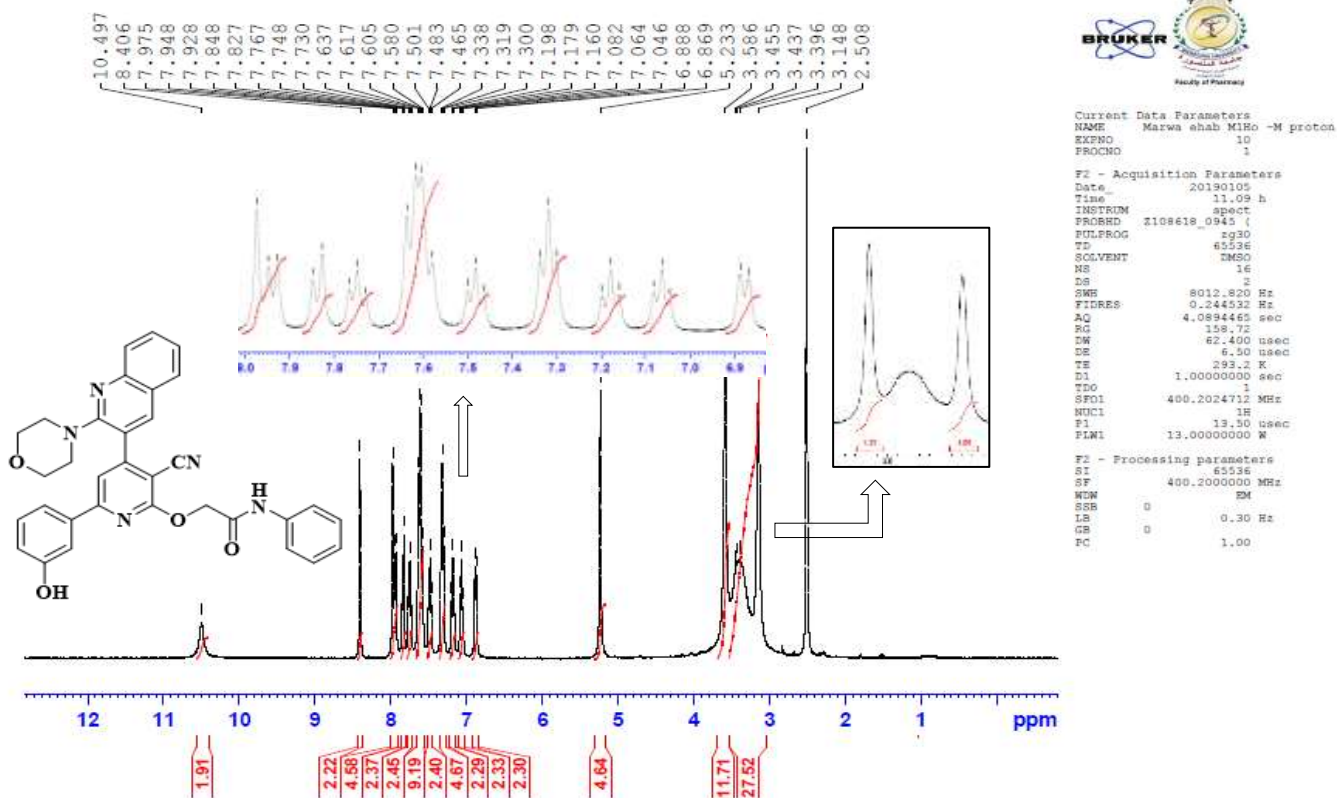

### H<sup>1</sup>-NMR spectra of compound 11a

Mrwa ehab -Mifo-DMSO-W-proton

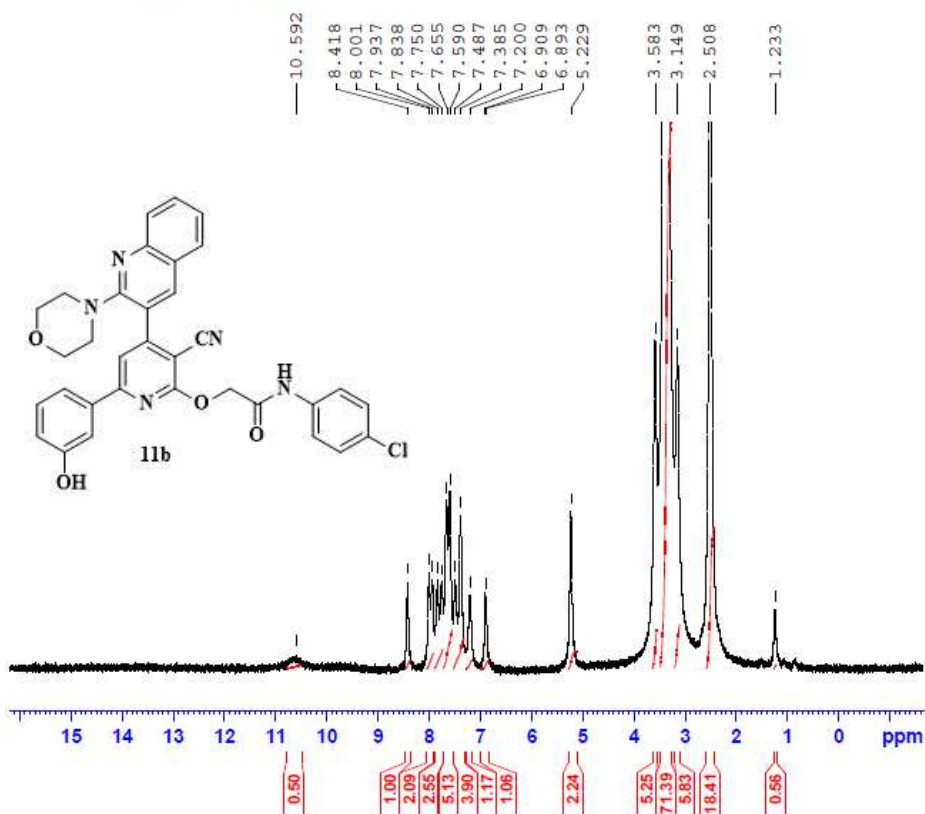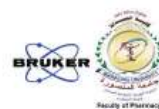

Current Data Parameters  
NAME Mrwa ehab -Mifo-DMSO-W-proton  
SI 10  
PROCNO 1  
F2 - Acquisition Parameters  
Date 20181212  
Time 12.51 h  
INSTRUM spect  
PROBHD X100c18\_0945 ( )  
PULPROG zg30  
TD 65536  
SOLVENT DMSO  
NS 16  
DS 2  
SWH 8012.820 Hz  
FIDRES 0.244512 Hz  
AQ 4.8894465 sec  
RG 197.77  
DM 62.400 usec  
DE 6.50 usec  
TE 292.3 K  
D8 1.00000000 sec  
TDC 1  
SFO1 400.2024712 MHz  
NUC1 1H  
PT 13.50 usec  
PL1 13.00000000 W  
F2 - Processing parameters  
SI 65536  
CF 400.2000000 MHz  
KEW 0  
CGB 0  
IE 0 0.10 Hz  
GB 0  
PC 1.00

$^1\text{H}$ -NMR spectra of compound 11b

marwa ehab -M190-proton-R

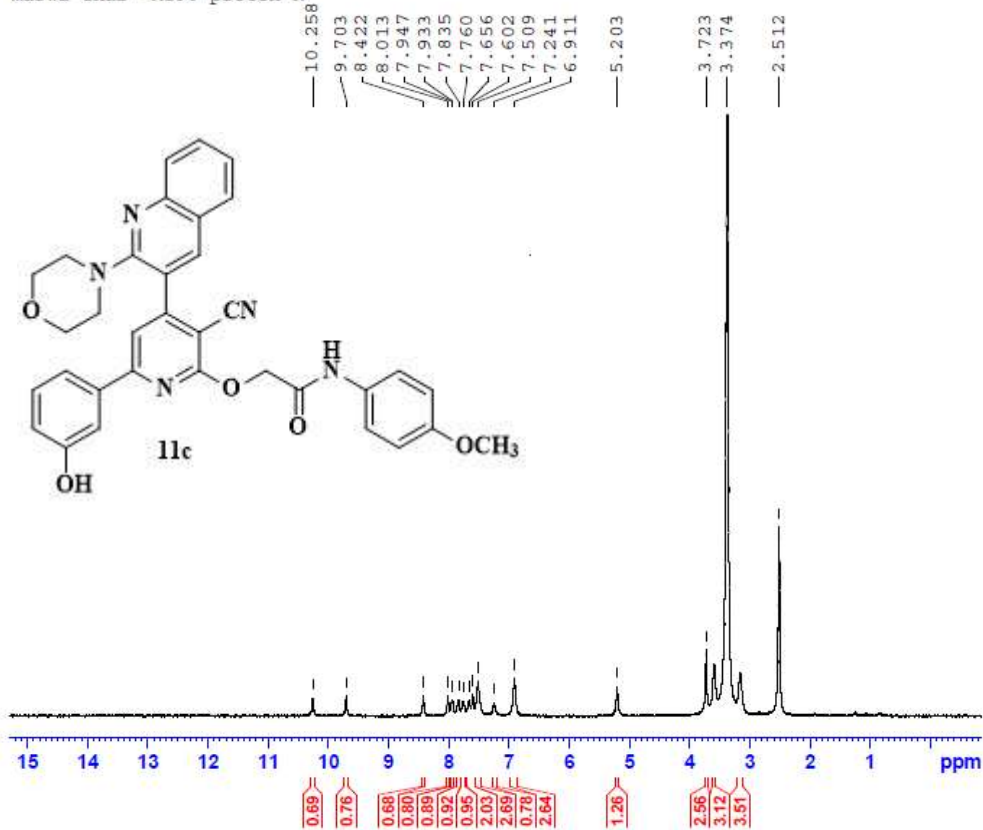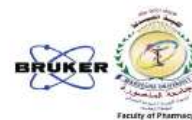

Current Data Parameters  
NAME marwa ehab -M190-proton-R  
EXPNO 10  
PROCNO 1  
F2 - Acquisition Parameters  
Date\_ 20190730  
Time 11.48 h  
INSTRUM spect  
PROBHD Y108618\_0945 (   
PULPROG zg30  
TD 65536  
SOLVENT DMSO  
NS 16  
DS 2  
SWH 8012.820 Hz  
FIDRES 0.244532 Hz  
AQ 4.0894465 sec  
RG 197.77  
DW 62.400 usec  
DE 6.50 usec  
TE 292.8 K  
D1 1.00000000 sec  
TEO 1  
SFO1 400.2024712 MHz  
NUC1 1H  
P1 13.50 usec  
PLW1 13.00000000 W  
F2 - Processing parameters  
SI 65536  
SF 400.2000000 MHz  
WVW RM  
SFB 0  
LB 0.30 Hz  
GB 0  
PC 1.00

H<sup>1</sup>-NMR spectra of compound 11c

|                        |                      |                   |                                                      |                        |                      |
|------------------------|----------------------|-------------------|------------------------------------------------------|------------------------|----------------------|
| Acquisition Time (sec) | 4.0894               | Comment           | Marwa Ehab-M7ho-AS-proton                            | Date                   | 03 Jun 2019 10:51:12 |
| Date Stamp             | 03 Jun 2019 10:51:12 | File Name         | D:\PhD\NMR\scheme 3\Marwa Ehab-M7ho-AS-proton\10\fid | Origin                 | spoet                |
| Frequency (MHz)        | 400.20               | Nucleus           | <sup>1</sup> H                                       | Number of Transients   | 16                   |
| Original Points Count  | 32768                | Owner             | nmr                                                  | Points Count           | 32768                |
| Receiver Gain          | 112.56               | SW(cyclical) (Hz) | 8012.82                                              | Solvent                | DMSO-d6              |
| Spectrum Type          | STANDARD             | Sweep Width (Hz)  | 8012.58                                              | Temperature (degree C) | 19.913               |
|                        |                      |                   |                                                      | Spectrum Offset (Hz)   | 2471.2351            |

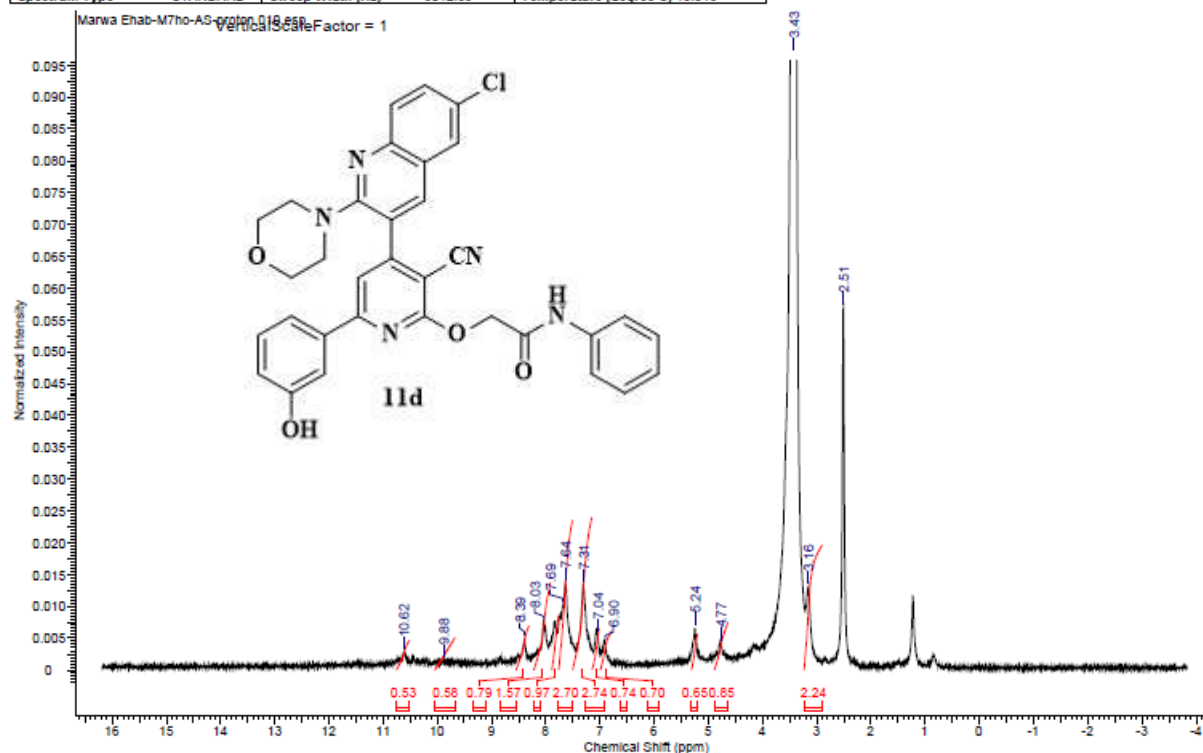

**<sup>1</sup>H-NMR spectra of compound 11d**

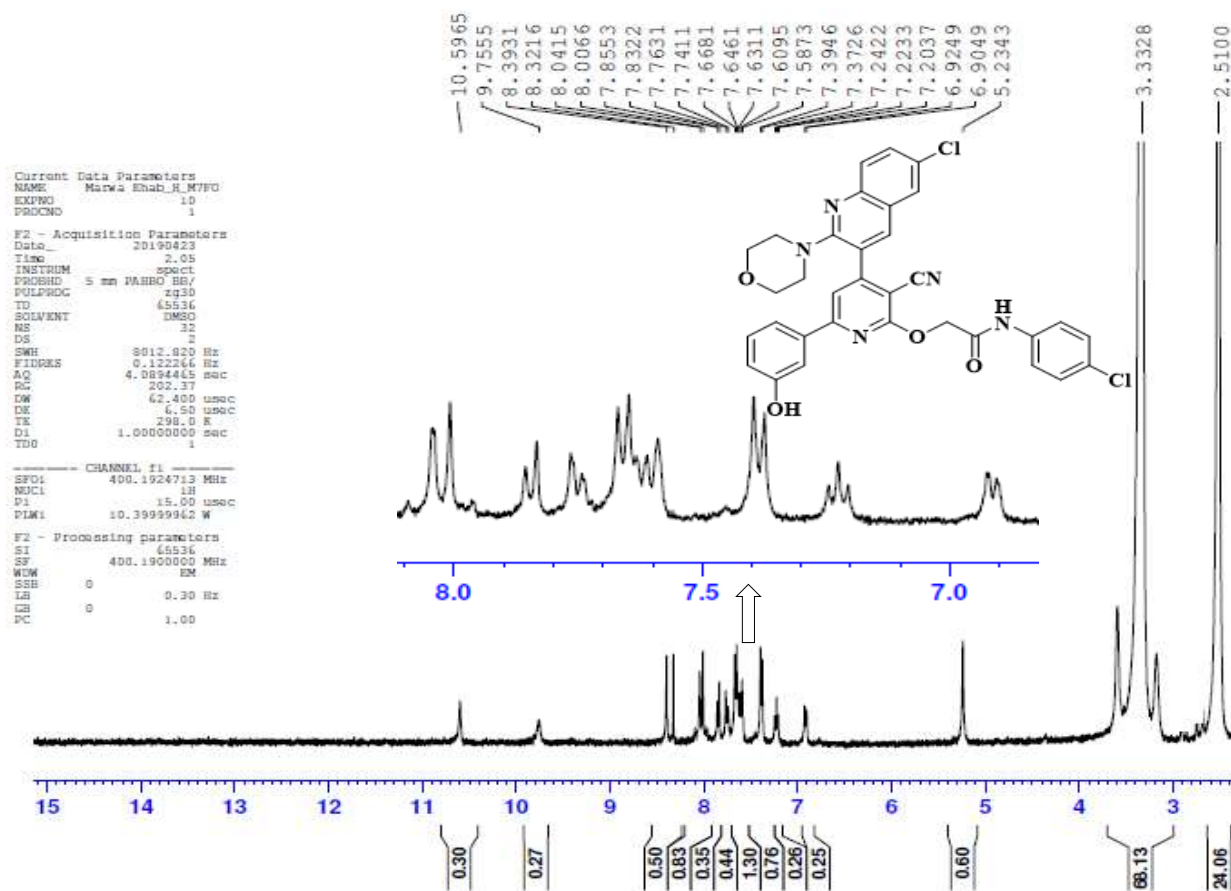H<sup>1</sup>-NMR spectra of compound 11e



marwa ehab -M790-proton-R

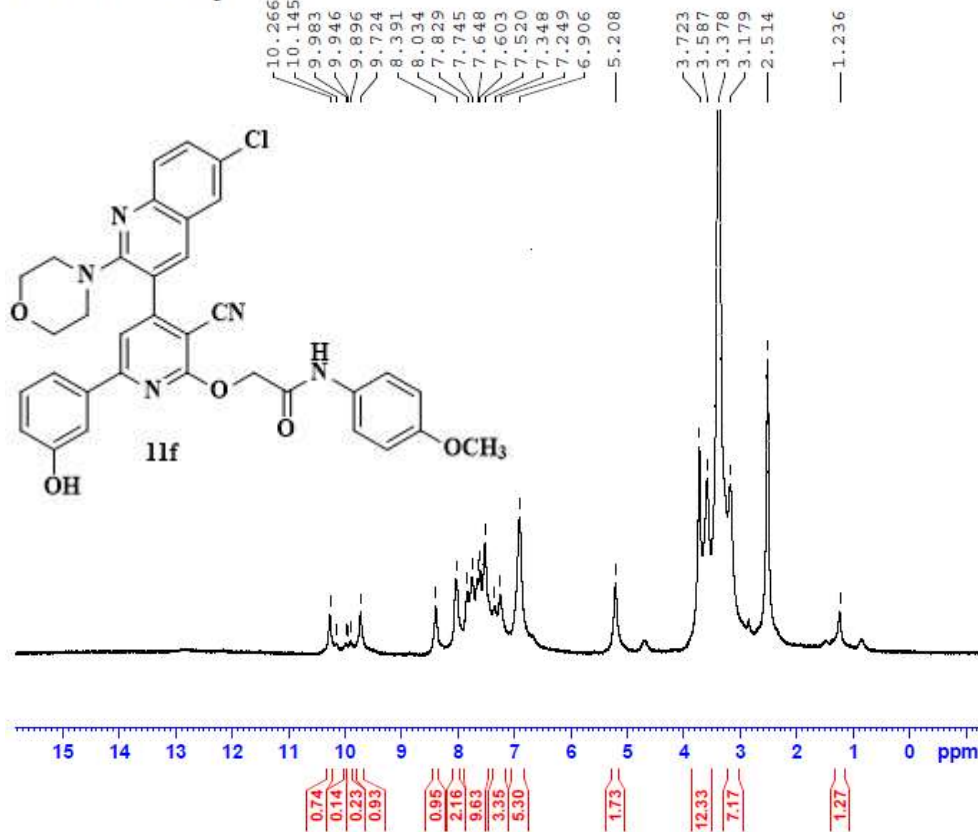

**BRUKER**  
 Faculty of Pharmacy

Current Data Parameters  
 NAME marwa ehab -M790-proton-R  
 EXPNO 10  
 PROCNO 1

F2 - Acquisition Parameters  
 Date 20190730  
 Time 11.53 h  
 INSTRUM spect  
 PROBRD Z108618\_0945 (  
 PULPROG zg30  
 TD 65536  
 SOLVENT DMSO  
 NS 16  
 DS 2  
 SWH 8012.820 Hz  
 FIDRES 0.244532 Hz  
 AQ 4.0894465 sec  
 RG 158.72  
 EC 158.72  
 DW 62.400 usec  
 DE 6.50 usec  
 TE 293.1 K  
 D1 1.00000000 sec  
 TDO 1  
 SFO1 400.2024712 MHz  
 NUC1 1H  
 P1 13.50 usec  
 PLW1 13.00000000 W

F2 - Processing parameters  
 SI 65536  
 SF 400.2000000 MHz  
 WDW EM  
 SSB 0  
 LB 0.30 Hz  
 GB 0  
 PC 1.00

H<sup>1</sup>-NMR spectra of compound 11f

Marwa ehab M4Ho -M proton

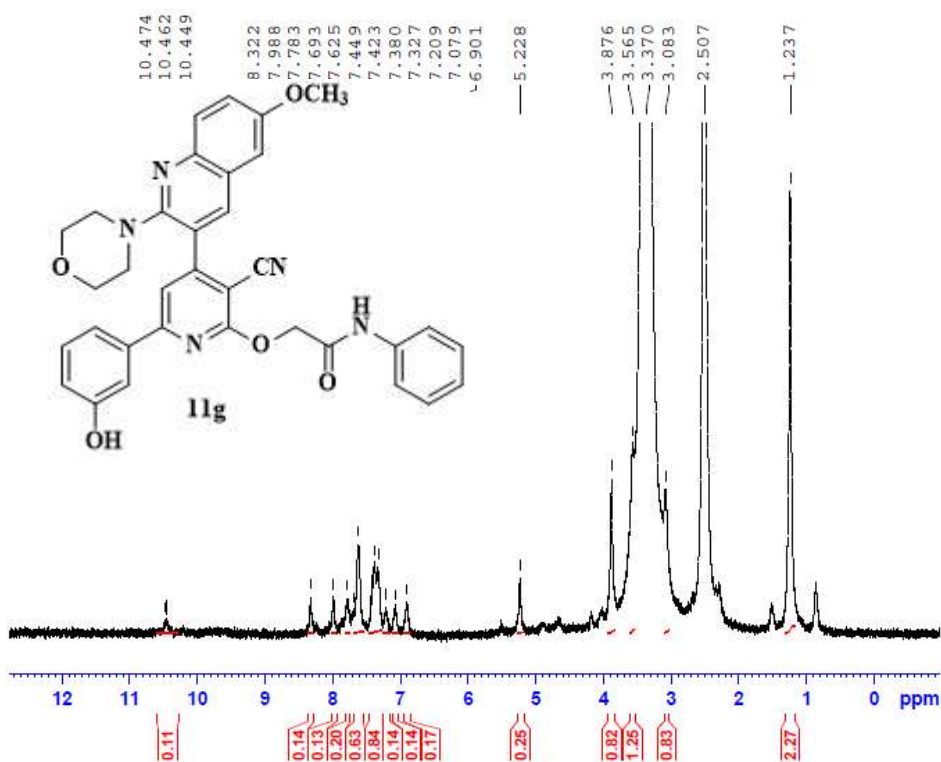

**BRUKER**  
 Faculty of Pharmacy

Current Data Parameters  
 NAME Marwa ehab M4Ho -M proton  
 EXPNO 10  
 PROCNO 1

F2 - Acquisition Parameters  
 Date 20190105  
 Time 11.05 h  
 INSTRUM spect  
 PROBRD Z108618\_0945 (  
 PULPROG zg30  
 TD 65536  
 SOLVENT DMSO  
 NS 16  
 DS 2  
 SWH 8012.820 Hz  
 FIDRES 0.244532 Hz  
 AQ 4.0894465 sec  
 RG 176.72  
 EC 176.72  
 DW 62.400 usec  
 DE 6.50 usec  
 TE 293.4 K  
 D1 1.00000000 sec  
 TDO 1  
 SFO1 400.2024712 MHz  
 NUC1 1H  
 P1 13.50 usec  
 PLW1 13.00000000 W

F2 - Processing parameters  
 SI 65536  
 SF 400.2000000 MHz  
 WDW EM  
 SSB 0  
 LB 0.30 Hz  
 GB 0  
 PC 1.00

H<sup>1</sup>-NMR spectra of compound 11g

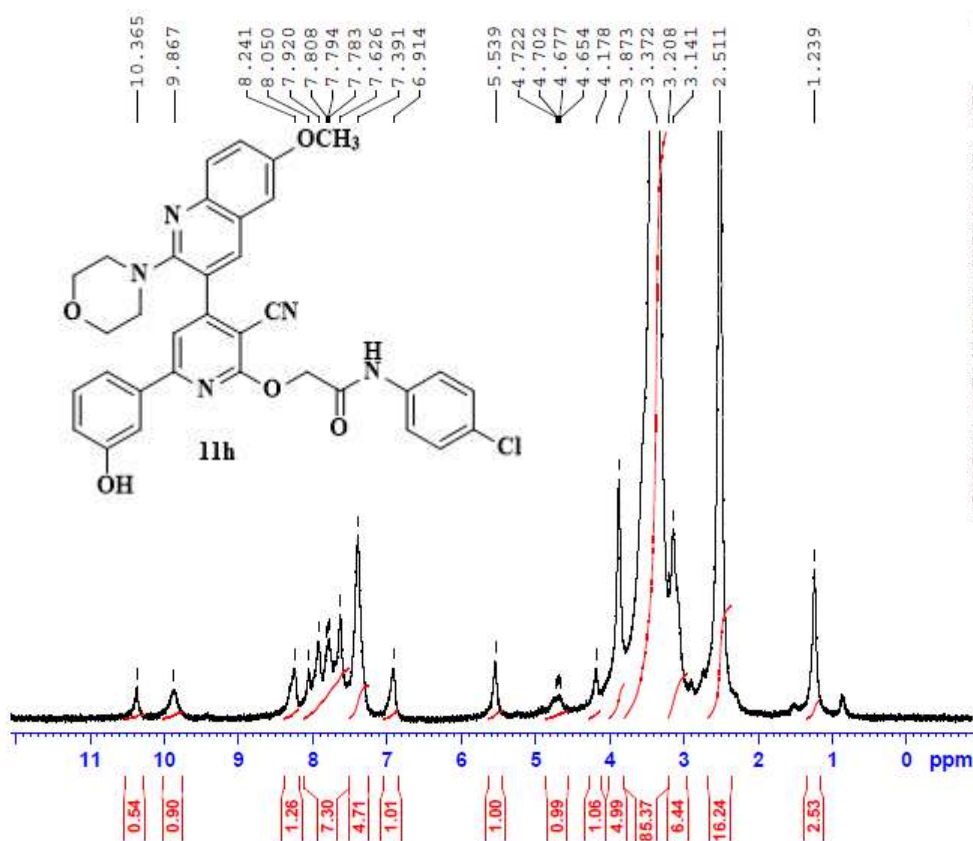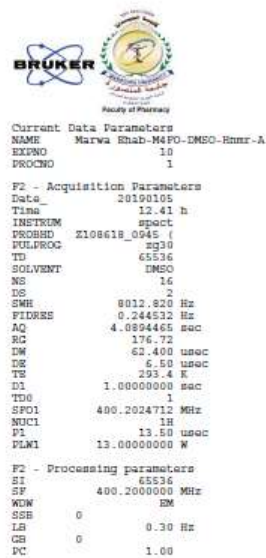

### H<sup>1</sup>-NMR spectra of compound 11h

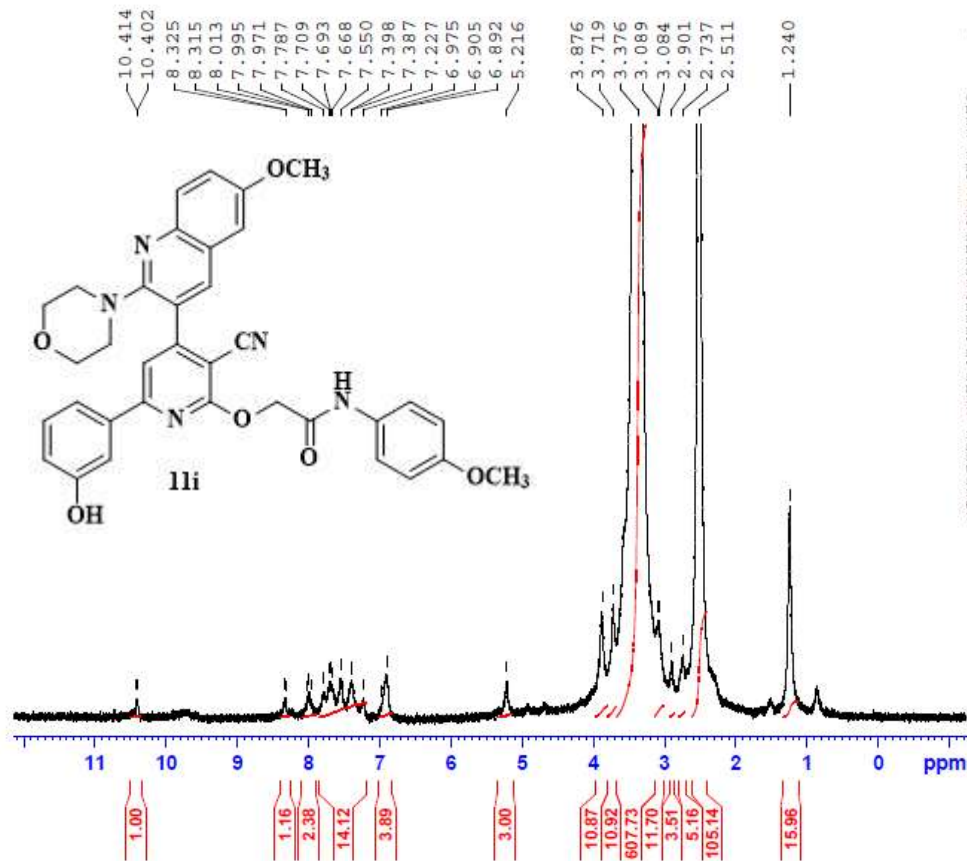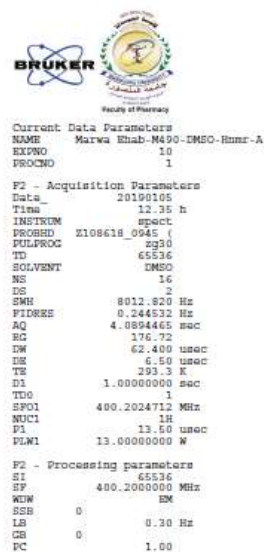

### H<sup>1</sup>-NMR spectra of compound 11i



Marwa ehab Miho -M carbon

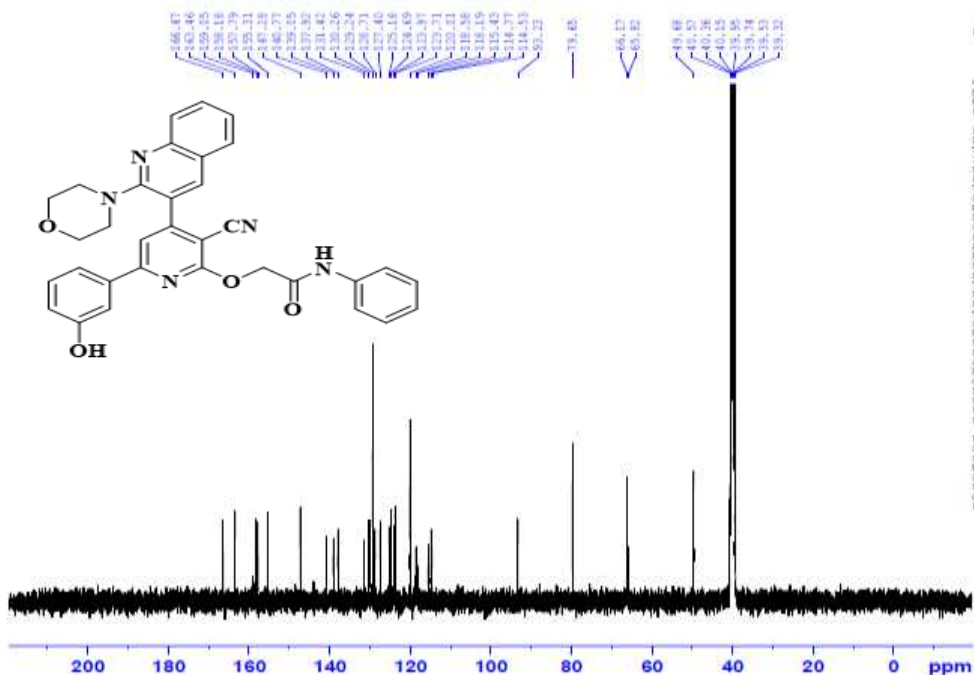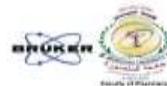

Current Data Parameters  
 NAME Marwa ehab Miho -M carbon  
 EXPNO 10  
 PROCNO 1  
 F2 - Acquisition Parameters  
 Date\_ 20190109  
 Time 11:27 A  
 INSTRUM spect  
 PROBRD siusw18 0945 J  
 PULPROG zgpg30  
 TD 65536  
 SCLVNT DMSO  
 NS 1024  
 DS 4  
 SWH 24038.461 Mc  
 FIDRES 0.732598 Hz  
 AQ 1.5631488 sec  
 RG 197.77  
 OW 20.000 usec  
 DE 4.50 usec  
 TE 303.2 K  
 D1 2.0000000 sec  
 D11 0.0300000 sec  
 TDC 1  
 SFO1 100.6404231 MHz  
 NUC1 13C  
 P1 10.00 usec  
 PLW1 47.0000000 W  
 SFO2 400.2014000 MHz  
 NUC2 1H  
 CDEPRG12 waltz16  
 PCPD2 90.00 usec  
 PLW2 13.0000000 W  
 PLW3 0.2924999 W  
 PLW4 0.14713000 W  
 F2 - Processing parameters  
 SI 32768  
 SF 100.6203700 MHz  
 WDW EM  
 SSB 0  
 LB 1.00 Hz  
 GB 0  
 EC 1.40

<sup>13</sup>C-NMR spectra of compound 11a

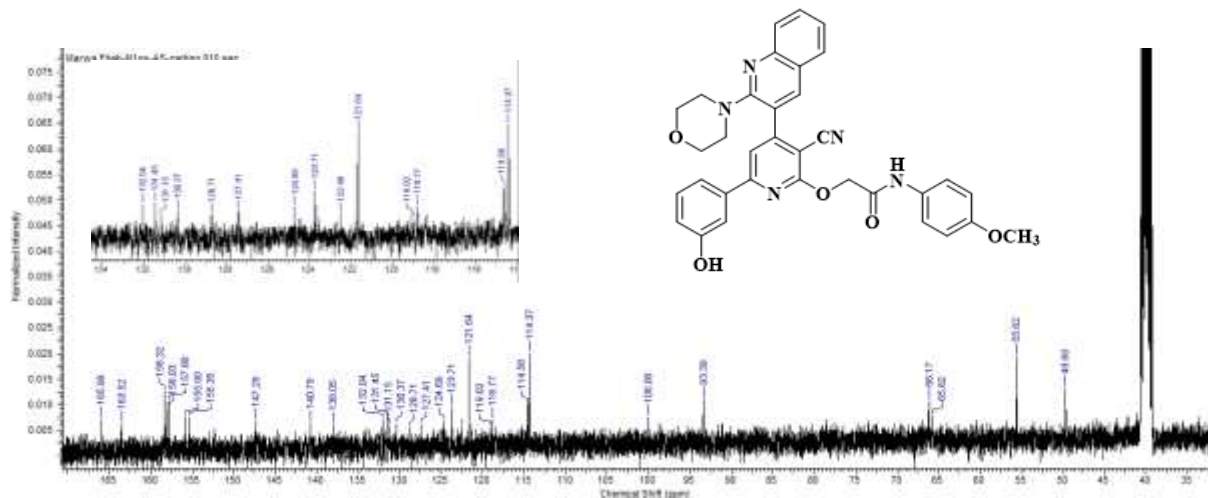

<sup>13</sup>C-NMR spectra of compound 11c

marwa-ehab-m7b #133 RT: 2.24 AV: 1 SB: 2 4.66, 4.69 NL: 3.61E2  
T: (0,0) +c EI Full ms [40.00-1000.00]

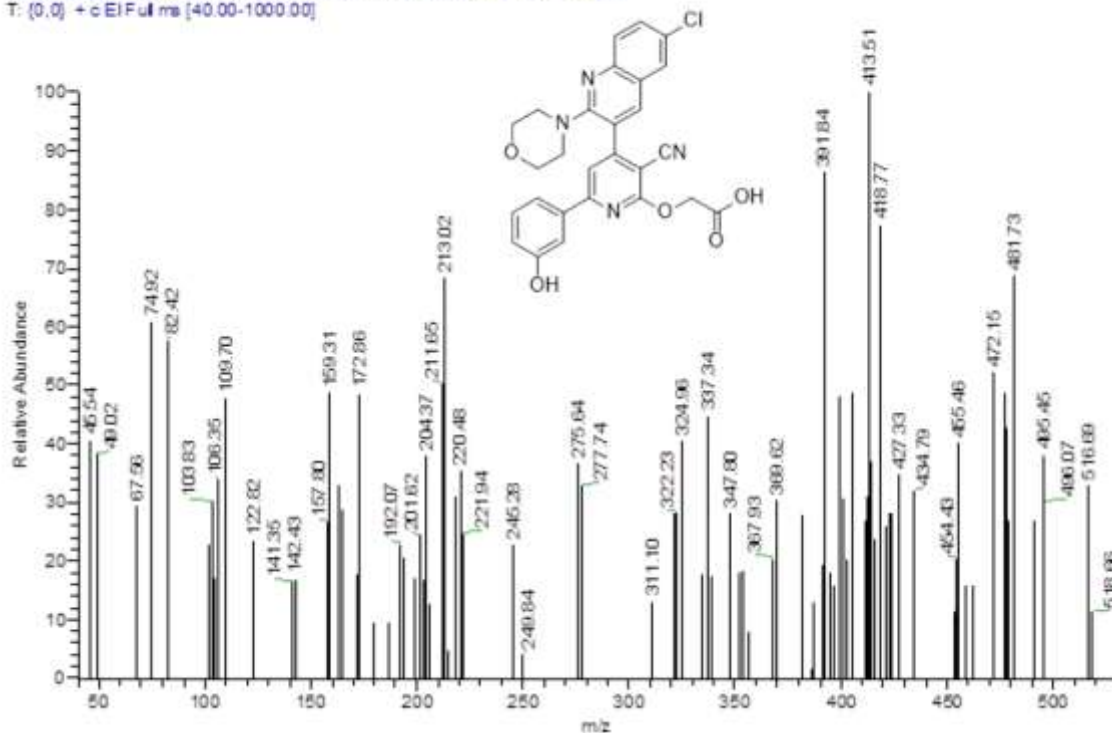

Mass spectrum for compound 9a

marwa-ehab-m7b #209 RT: 3.51 AV: 1 SB: 2 4.66, 4.66 NL: 3.28E2  
T: (0,0) +c EI Full ms [40.00-1000.00]

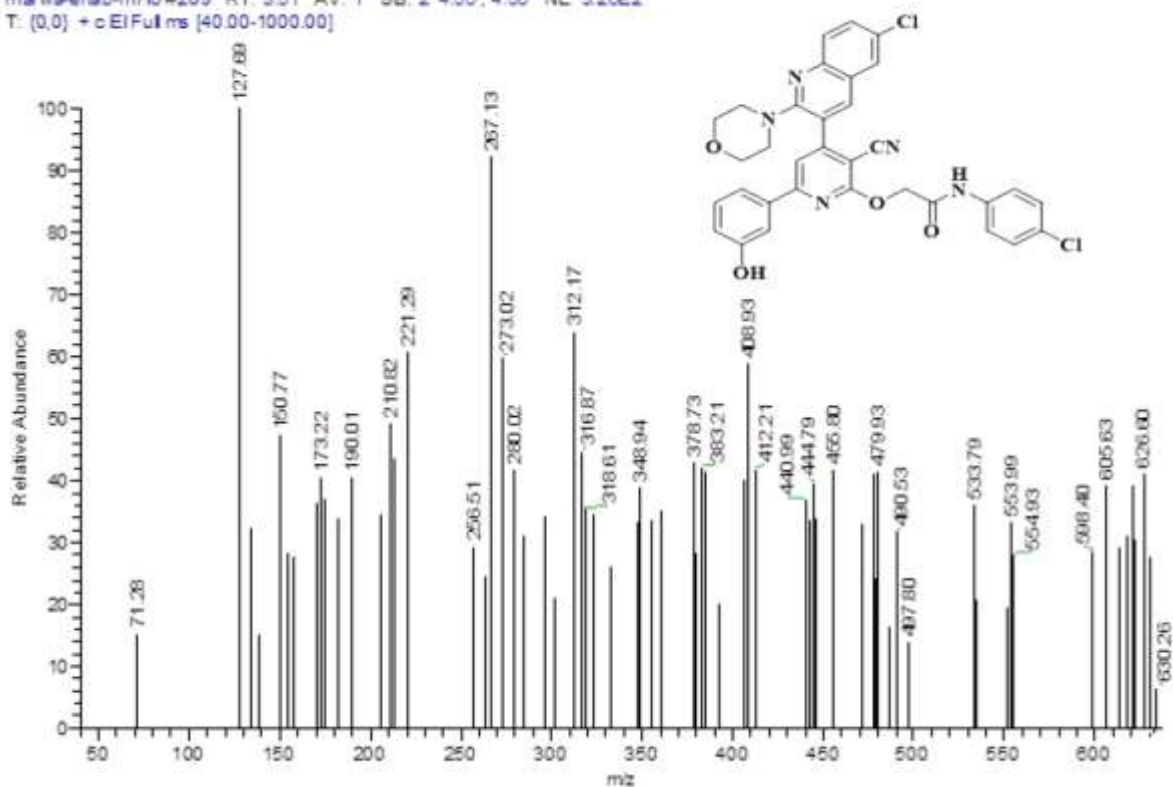

Mass spectrum for compound 11e

marwa-ehab-m790 #220 RT: 3.70 AV: 1 SB: 2 4.55, 4.55 NL: 4.51E2  
T: {0,0} + c EI Full ms [40.00-1000.00]

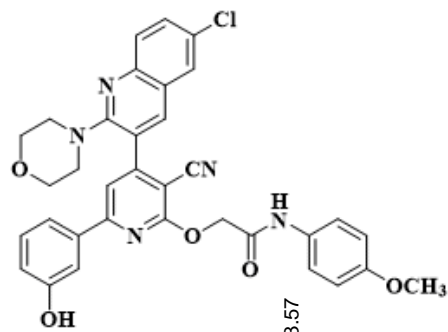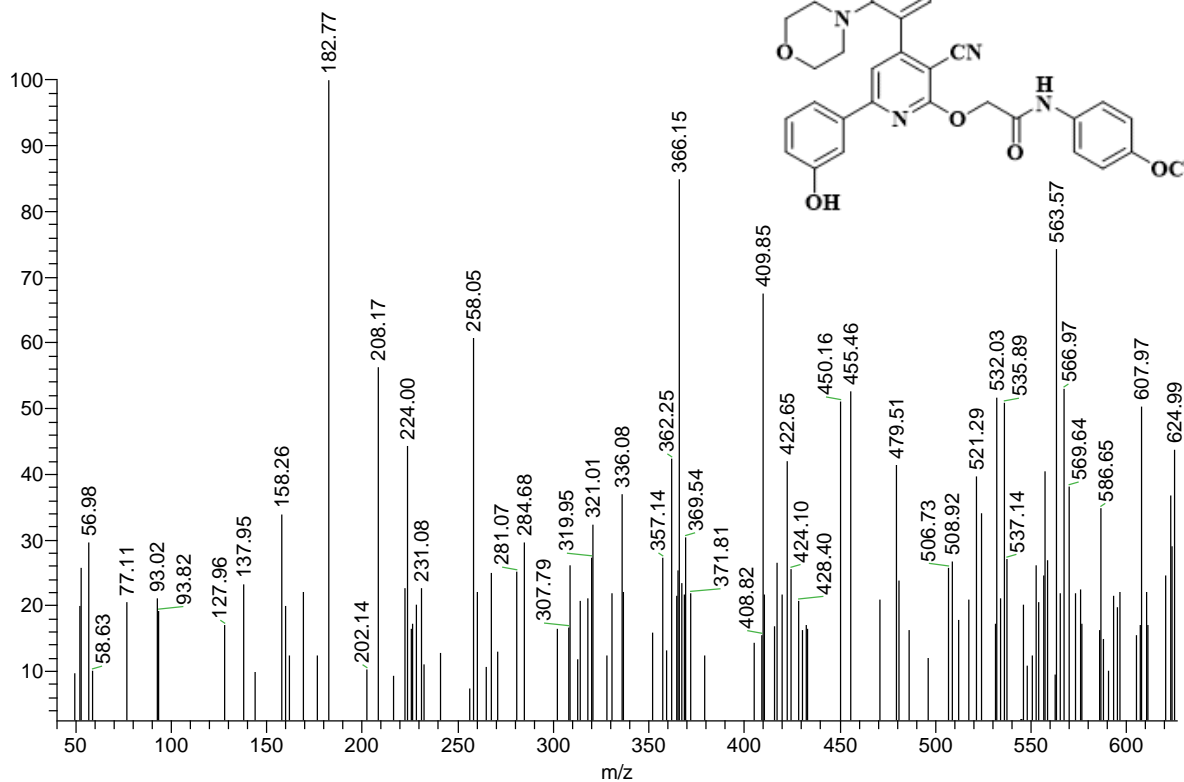

Mass spectrum for compound 11f

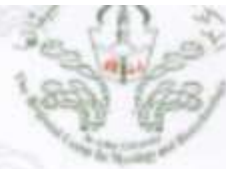

**Requester Data:**

**Name:** Dr. Marwa Ehab Mohamed  
**Authority:** Faculty of Pharmacy,  
 Alexandria University

**Sample Data:**

Twenty samples had been submitted for elemental analysis.

**Analysis Report:**

| Sample Code                 | C%    | H%   | N%    |
|-----------------------------|-------|------|-------|
| M <sub>1</sub> cN           | 68.71 | 5.24 | 19.38 |
| M <sub>1</sub> J            | 71.09 | 5.21 | 12.96 |
| M <sub>2</sub>              | 68.42 | 4.75 | 12.94 |
| M <sub>4</sub> e            | 70.38 | 5.84 | 11.50 |
| M <sub>4</sub> k            | 69.87 | 5.68 | 11.79 |
| M <sub>5</sub>              | 66.59 | 4.83 | 11.75 |
| M <sub>7</sub> a <b>7b</b>  | 64.58 | 4.59 | 11.34 |
| M <sub>7</sub> b <b>9b</b>  | 62.96 | 4.13 | 11.06 |
| M <sub>7</sub> e            | 67.40 | 5.28 | 11.37 |
| M <sub>7</sub> e N          | 63.26 | 4.69 | 17.58 |
| M <sub>7</sub> f <b>11e</b> | 63.44 | 4.21 | 11.39 |
| M <sub>7</sub> h <b>11d</b> | 66.81 | 4.62 | 11.94 |
| M <sub>7</sub> J            | 66.26 | 4.69 | 11.72 |
| M <sub>7</sub> k            | 66.49 | 4.88 | 11.69 |
| M <sub>8</sub>              | 63.45 | 4.11 | 11.94 |
| N <sub>2</sub>              | 71.47 | 5.28 | 13.02 |
| N <sub>5</sub>              | 69.43 | 5.34 | 12.13 |
| O <sub>1</sub>              | 71.49 | 4.06 | 15.95 |
| O <sub>4</sub>              | 68.95 | 4.32 | 14.67 |
| O <sub>7</sub>              | 64.71 | 3.19 | 14.62 |

**INVESTIGATOR**

*M. Ehab*

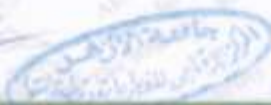

**DIRECTOR**

*H. Shalaby*

جامعة الأزهر  
**Al-Azhar University**  
 المركز الإقليمي للفطريات وتطبيقاتها  
**The Regional Center for Mycology and Biotechnology**

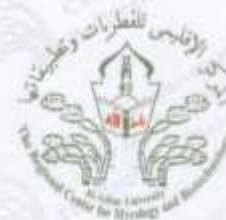

**Requester Data:**

**Name:** Dr. Marwa Ehab Abdel-Aziz  
**Authority:** Faculty of Pharmacy,  
 Alexandria University

**Sample Data:**

Seven samples had been submitted for elemental analysis.

**Analysis Report:**

| Sample Code           | C%    | H%   | N%    |
|-----------------------|-------|------|-------|
| M <sub>1</sub> go 11c | 69.32 | 5.13 | 12.18 |
| M <sub>1</sub> ko     | 71.50 | 5.49 | 12.61 |
| M <sub>4</sub> d4o    | 68.94 | 4.97 | 16.27 |
| M <sub>7</sub> do     | 67.91 | 4.38 | 11.49 |
| M <sub>7</sub> d2o    | 61.53 | 3.98 | 17.08 |
| M <sub>7</sub> d3o    | 64.89 | 4.58 | 15.35 |
| M <sub>7</sub> go 11f | 65.47 | 4.63 | 11.45 |

**INVESTIGATOR**

**DIRECTOR**

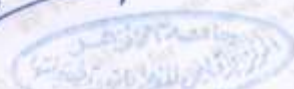



Authority: Faculty of Pharmacy,  
Alexandria University

Sample Data:

Twenty samples had been submitted for elemental analysis.

Analysis Report:

| Sample Code       | C%    | H%   | N%    |
|-------------------|-------|------|-------|
| M1 a 7a           | 69.30 | 4.94 | 12.29 |
| M1 b 9a           | 67.49 | 4.83 | 11.88 |
| M1 d              | 72.86 | 4.85 | 12.40 |
| M1 e              | 71.88 | 5.78 | 12.23 |
| M1 f 11b          | 67.13 | 4.60 | 12.06 |
| M1 h 11a          | 70.89 | 4.96 | 12.31 |
| M1 d <sub>2</sub> | 65.41 | 4.29 | 18.06 |
| M1 d <sub>3</sub> | 68.98 | 4.57 | 16.24 |
| M1 d <sub>4</sub> | 70.43 | 4.89 | 17.09 |
| M4 a 7c           | 67.54 | 5.01 | 11.49 |
| M4 b 9c           | 65.90 | 4.89 | 11.24 |
| M4 d              | 70.51 | 5.13 | 11.57 |
| M4 f 11h          | 65.92 | 4.67 | 11.52 |
| M4 g 11i          | 68.34 | 5.24 | 11.49 |
| M4 h 11g          | 69.26 | 4.86 | 11.23 |
| M4 d <sub>2</sub> | 64.31 | 4.57 | 16.79 |
| M4 d <sub>3</sub> | 67.52 | 5.04 | 15.45 |
| M4 eN             | 66.54 | 5.37 | 17.83 |
| O <sub>3</sub>    | 68.43 | 4.65 | 12.99 |
| O <sub>6</sub>    | 66.59 | 4.83 | 12.17 |

INVESTIGATOR

M. Elaissi

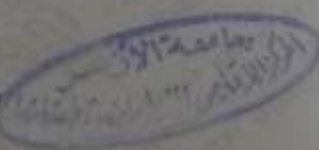

DIRECTOR

G. Sherb

### Scheme 3:

MARWA EHAB-O2  
 PROTON\_BSU DMSO {C:\data} aber 6

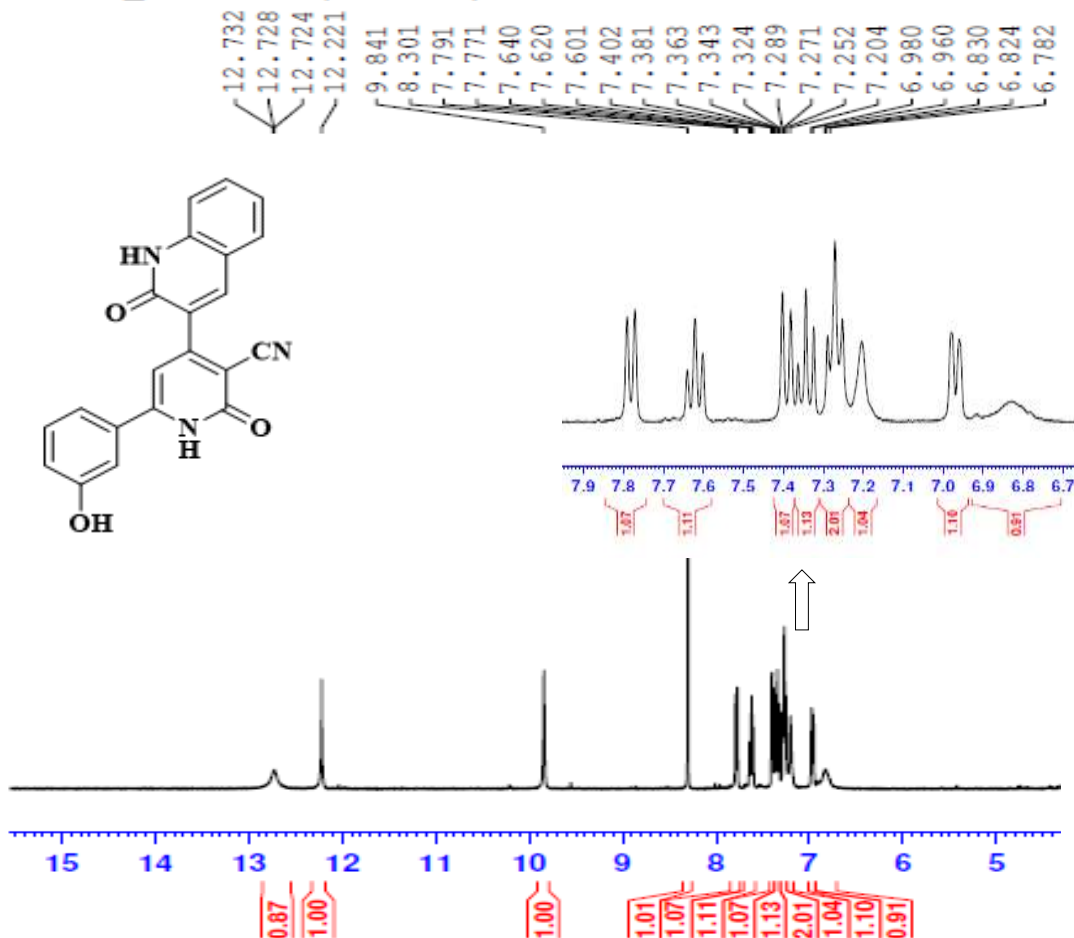

**<sup>1</sup>H-NMR spectra of compound 5a**

| Acquisition Time (sec) | Comment              | Marwa Ehab-O8-S-proton | Date                                       |
|------------------------|----------------------|------------------------|--------------------------------------------|
| 4.0894                 |                      |                        | 21 Oct 2018 11:44:32                       |
| Date Stamp             | 21 Oct 2018 11:44:32 | File Name              | D:\PhD\NMR\Scheme 2\Marwa Ehab-O8-S\10.fid |
| Frequency (MHz)        | 400.20               | Nucleus                | <sup>1</sup> H                             |
| Original Points Count  | 32768                | Owner                  | nmr                                        |
| Receiver Gain          | 175.72               | Number of Transients   | 32                                         |
| Spectrum Type          | STANDARD             | Points Count           | 32768                                      |
|                        |                      | Solvent                | DMSO-d6                                    |
|                        |                      | Temperature (degree C) | 18.922                                     |
|                        |                      | Spectrum Offset (Hz)   | 2471.2351                                  |

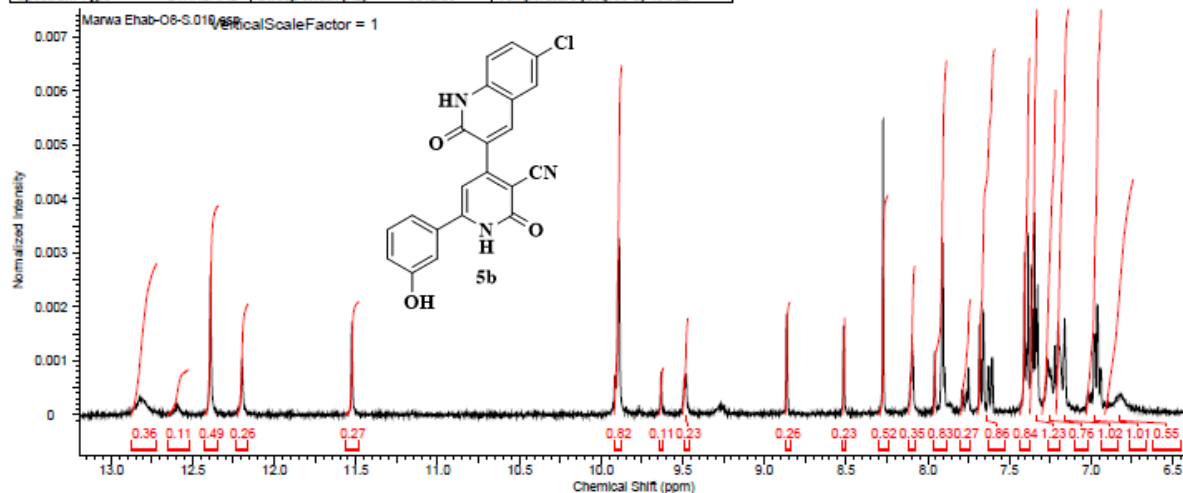

**<sup>1</sup>H-NMR spectra of compound 5b**

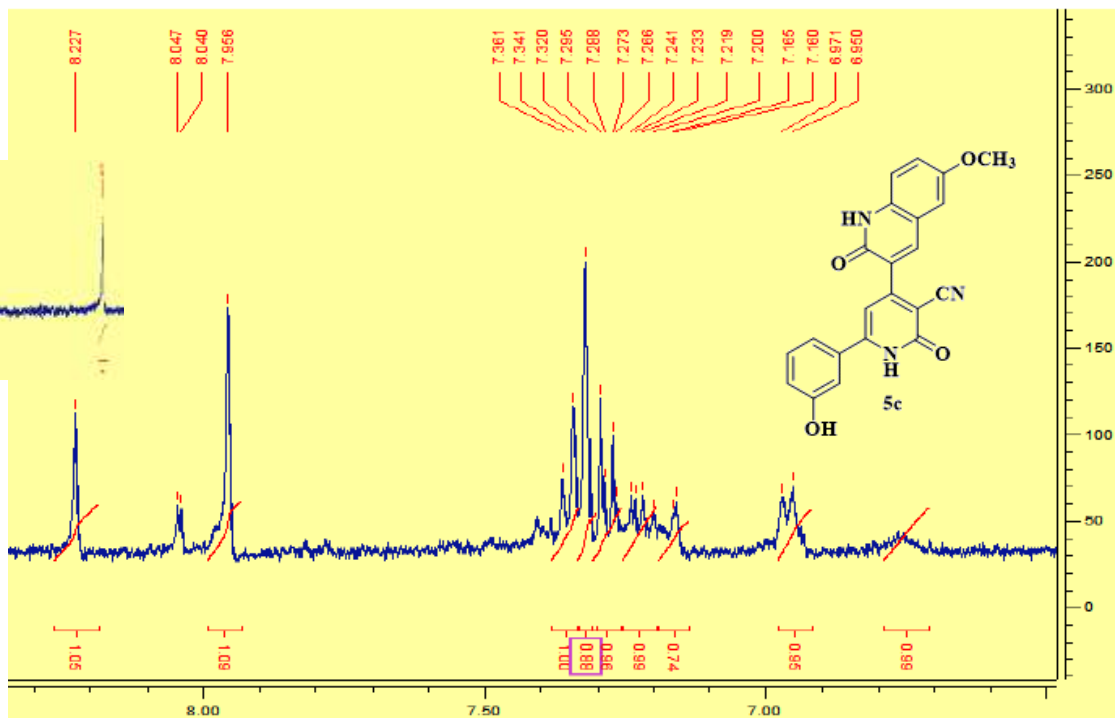

**H<sup>1</sup>-NMR spectra of compound 5c**

Mrwa ehab -03-DMSO-W-proton

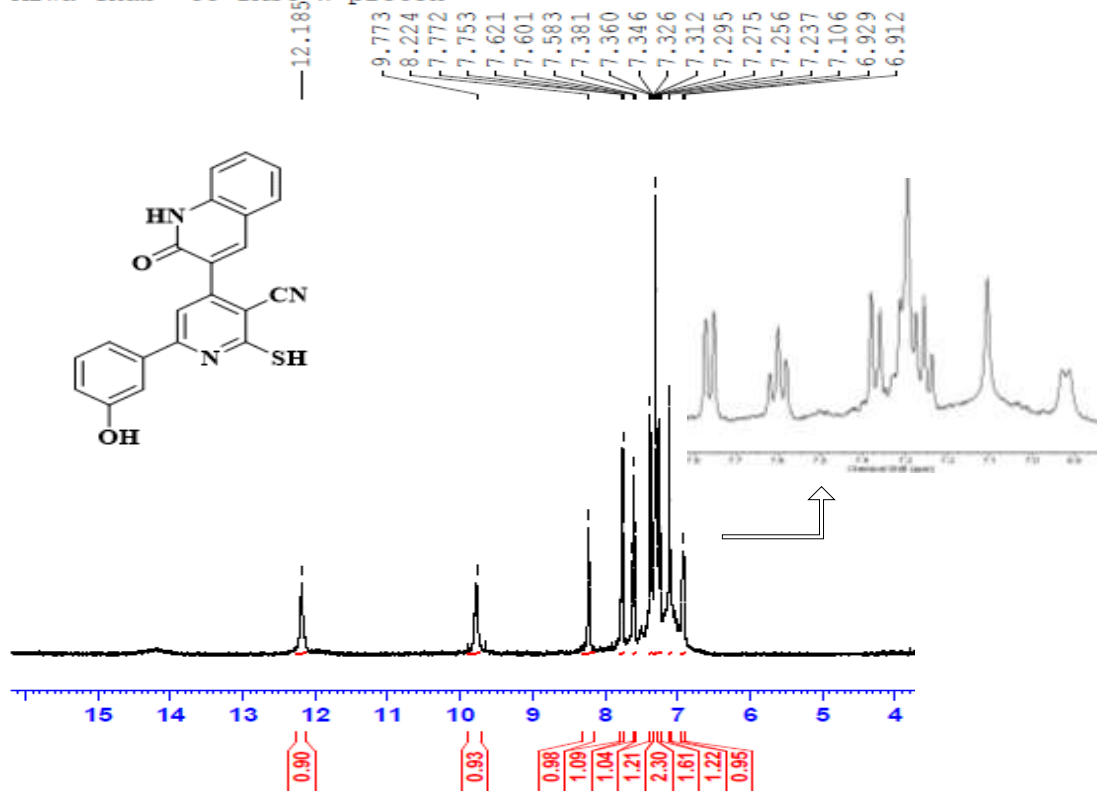

**H<sup>1</sup>-NMR spectra of compound 6a**

|                        |                      |                   |                                                   |                        |                      |
|------------------------|----------------------|-------------------|---------------------------------------------------|------------------------|----------------------|
| Acquisition Time (sec) | 4.0894               | Comment           | marwa ehav -O9-proton-R                           | Date                   | 30 Jul 2019 11:33:52 |
| Date Stamp             | 30 Jul 2019 11:33:52 | File Name         | D:\PhD\NMR\Scheme 2\marwa ehav -O9-proton-R10.fid | Origin                 | spect                |
| Frequency (MHz)        | 400.20               | Nucleus           | <sup>1</sup> H                                    | Number of Transients   | 16                   |
| Original Points Count  | 32768                | Owner             | nmr                                               | Points Count           | 32768                |
| Receiver Gain          | 197.77               | SW(cyclical) (Hz) | 8012.82                                           | Solvent                | DMSO-d6              |
| Spectrum Type          | STANDARD             | Sweep Width (Hz)  | 8012.58                                           | Temperature (degree C) | 19.723               |
|                        |                      |                   |                                                   | Pulse Sequence         | zg30                 |
|                        |                      |                   |                                                   | Spectrum Offset (Hz)   | 2471.2351            |

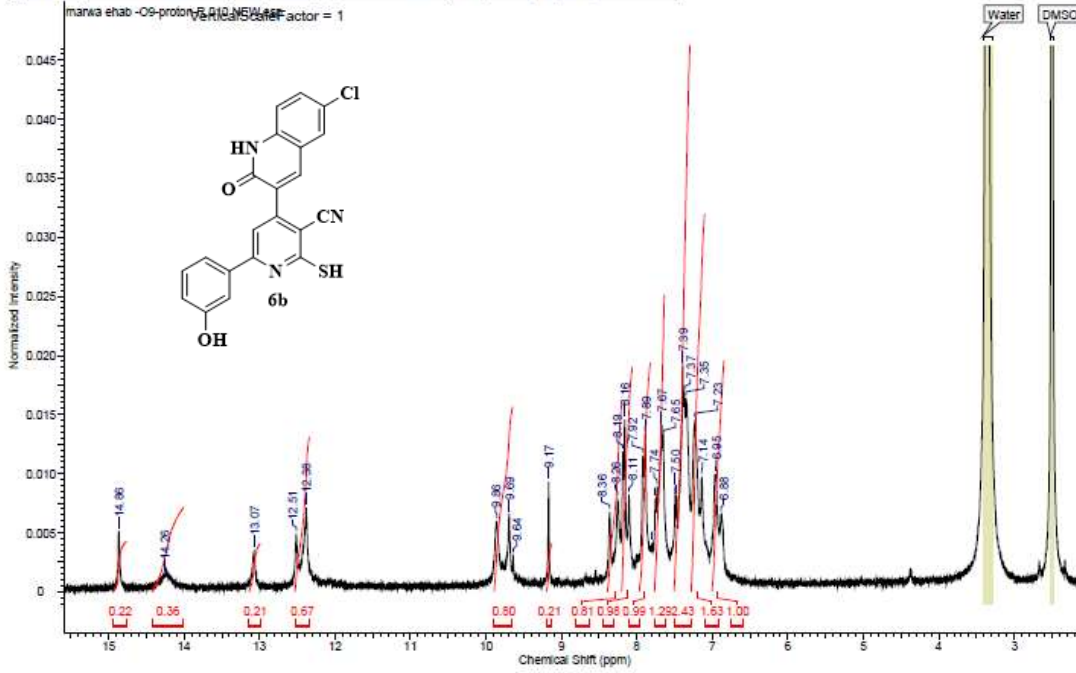

## <sup>1</sup>H-NMR spectra of compound 6b

Marwa Ehab-O6-DMSO-Hnmr-A

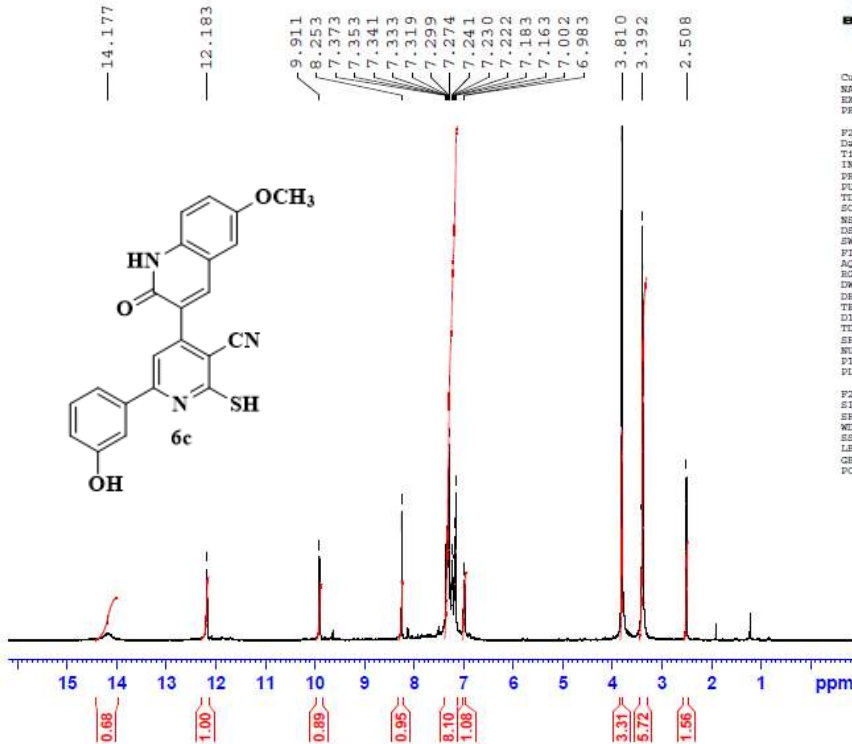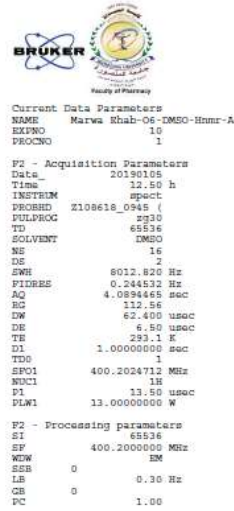

## <sup>1</sup>H-NMR spectra of compound 6c

EX-MARWA-01  
 PROTON\_BSU DMSO {C:\data} nmr 13

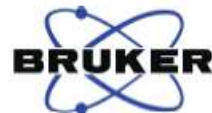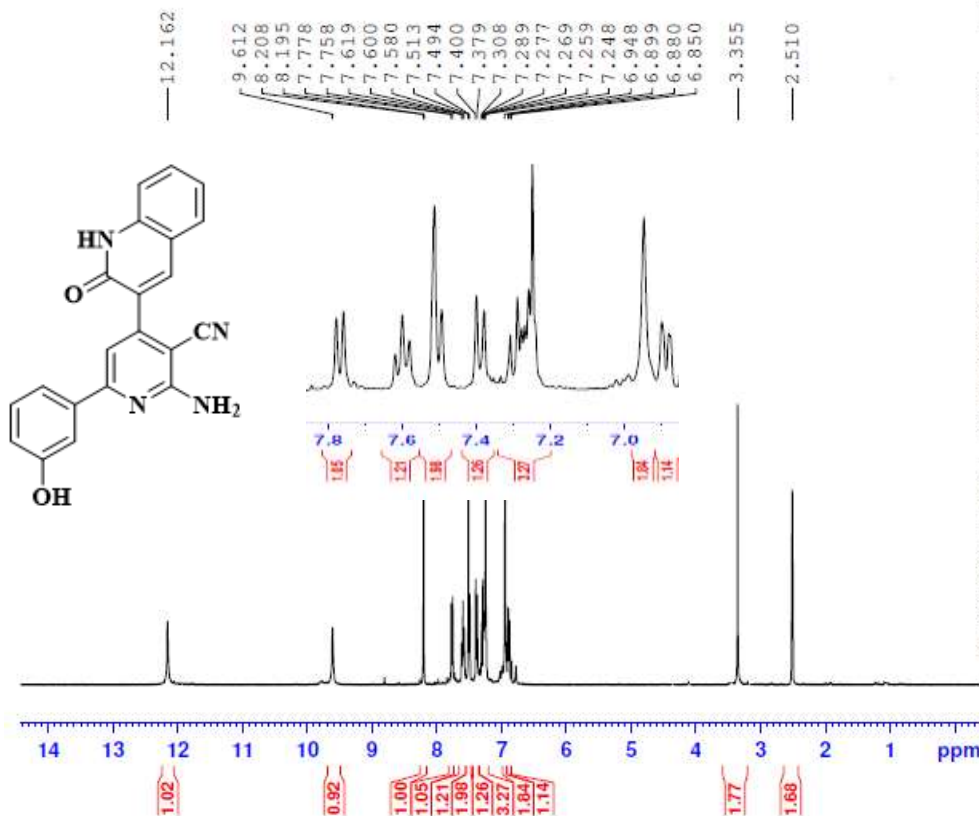

Current Data Parameters  
 NAME Dec24-2017-nmr  
 EXPNO 50  
 PROCNO 1

F2 - Acquisition Parameters  
 Date\_ 20171224  
 Time 10.16  
 INSTRUM spect  
 PROBHD 5 mm PABBO BH/  
 PULPROG zg30  
 TD 65536  
 SOLVENT DMSO  
 NS 16  
 DS 2  
 SWH 8012.820 Hz  
 FIDRES 0.122266 Hz  
 AQ 4.0894465 sec  
 RG 147.93  
 DW 62.400 usec  
 DE 6.50 usec  
 TE 298.1 K  
 D1 1.00000000 sec  
 TDO 1

CHANNEL f1  
 SFO1 400.1324710 MHz  
 NUC1 1H  
 P1 10.00 usec  
 PLW1 16.00000000 W

F2 - Processing parameters  
 SI 65536  
 SF 400.1300000 MHz  
 WDW EM  
 SSB 0  
 LB 0.10 Hz  
 GB 0  
 PC 1.00

**H<sup>1</sup>-NMR spectra of compound 7a**

Marwa Ehab\_H\_07

Microanalytical Unit - FOPCU - NMR laboratory  
 www.pharma.cu.edu.eg dir-mau.fopcu@pharma.cu.edu.eg

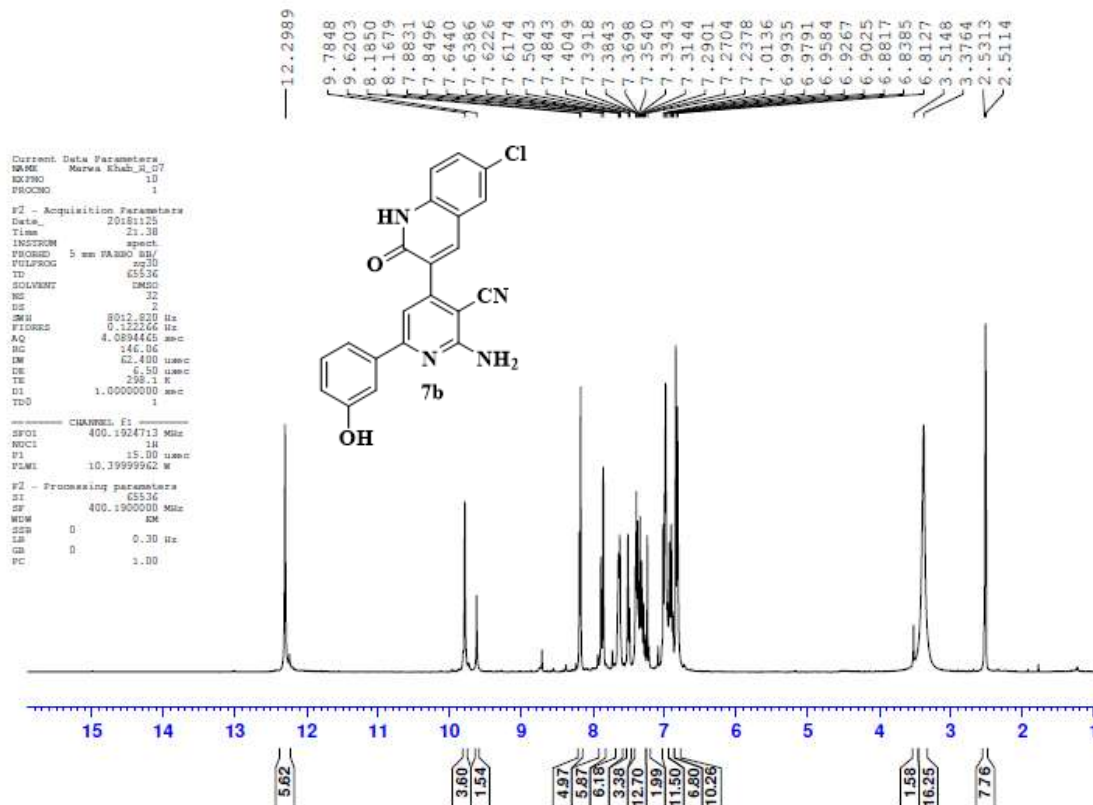

**H<sup>1</sup>-NMR spectra of compound 7b**

| Acquisition Time (sec) | 4.0894                     | Comment              | EX-MARVAEHAS-04 PROTON BSU DMSO (C:\data) aber 11 |                       |                |
|------------------------|----------------------------|----------------------|---------------------------------------------------|-----------------------|----------------|
| Date                   | 14 Aug 2018 10:27:44       | Date Stamp           | 14 Aug 2018 10:27:44                              |                       |                |
| File Name              | D:\PHD\NMR\Scheme 2\04\fid | Frequency (MHz)      | 400.13                                            | Nucleus               | <sup>1</sup> H |
| Number of Transients   | 16                         | Origin               | spec1                                             | Original Points Count | 32768          |
| Points Count           | 32768                      | Pulse Sequence       | zg30                                              | Receiver Gain         | 147.83         |
| Solvent                | DMSO-d6                    | Spectrum Offset (Hz) | 2470.9668                                         | Sweep Width (Hz)      | 8012.58        |
| Temperature (degree C) | 25.141                     | Spectrum Type        | STANDARD                                          |                       |                |

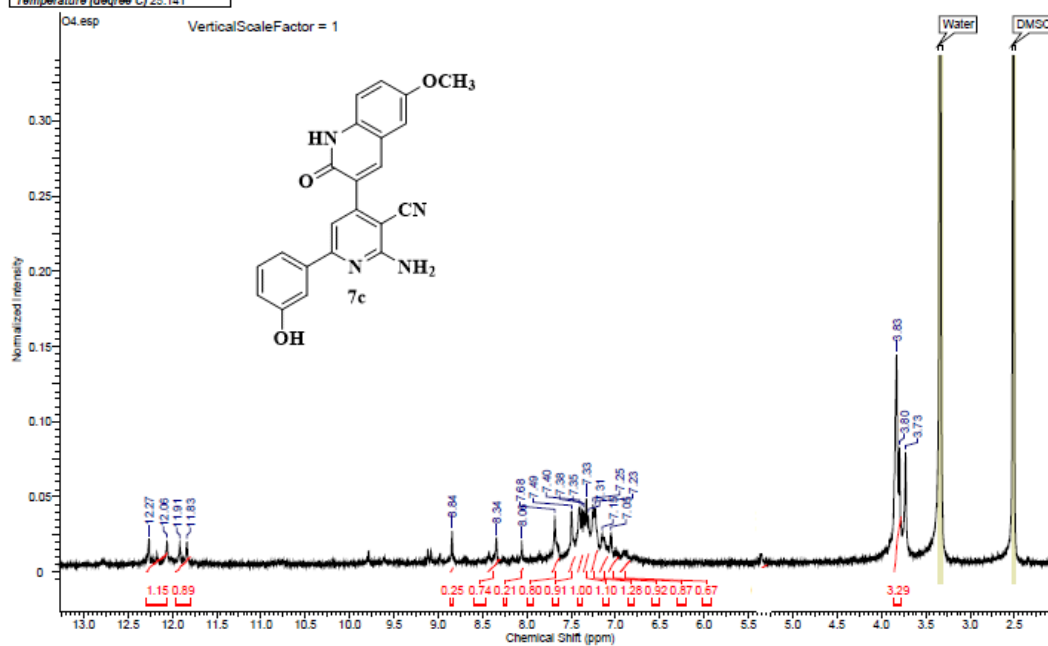

**<sup>1</sup>H-NMR spectra of compound 7c**

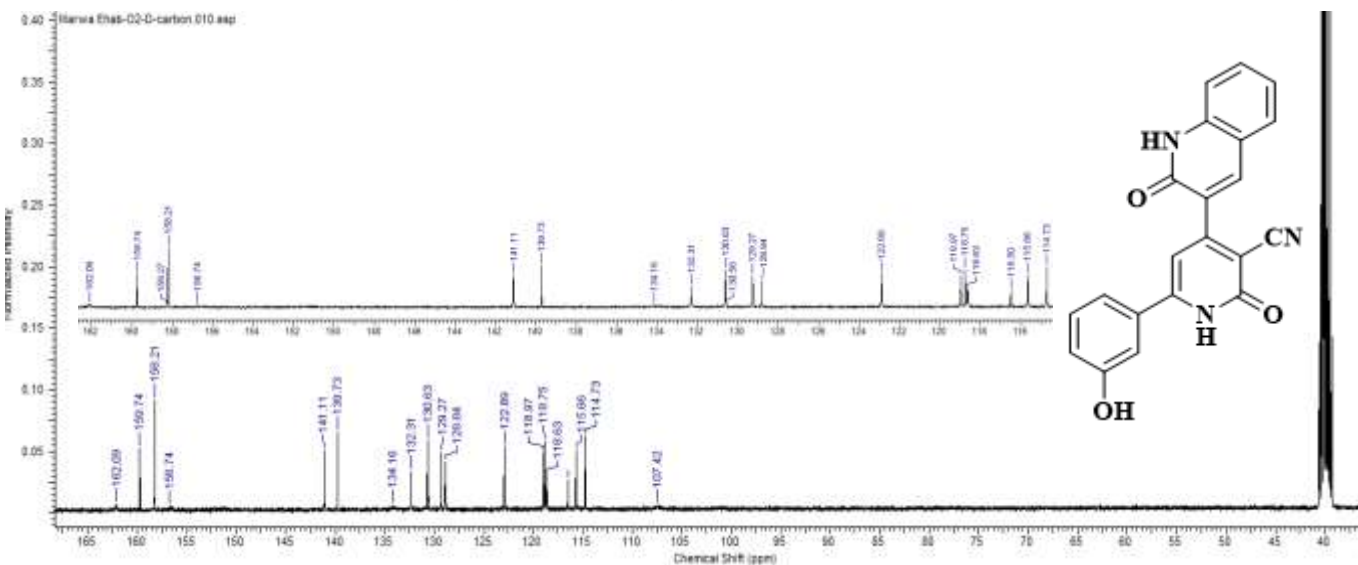

**<sup>13</sup>C-NMR spectra of compound 5a**

Marwa ehab O6 -M carbon

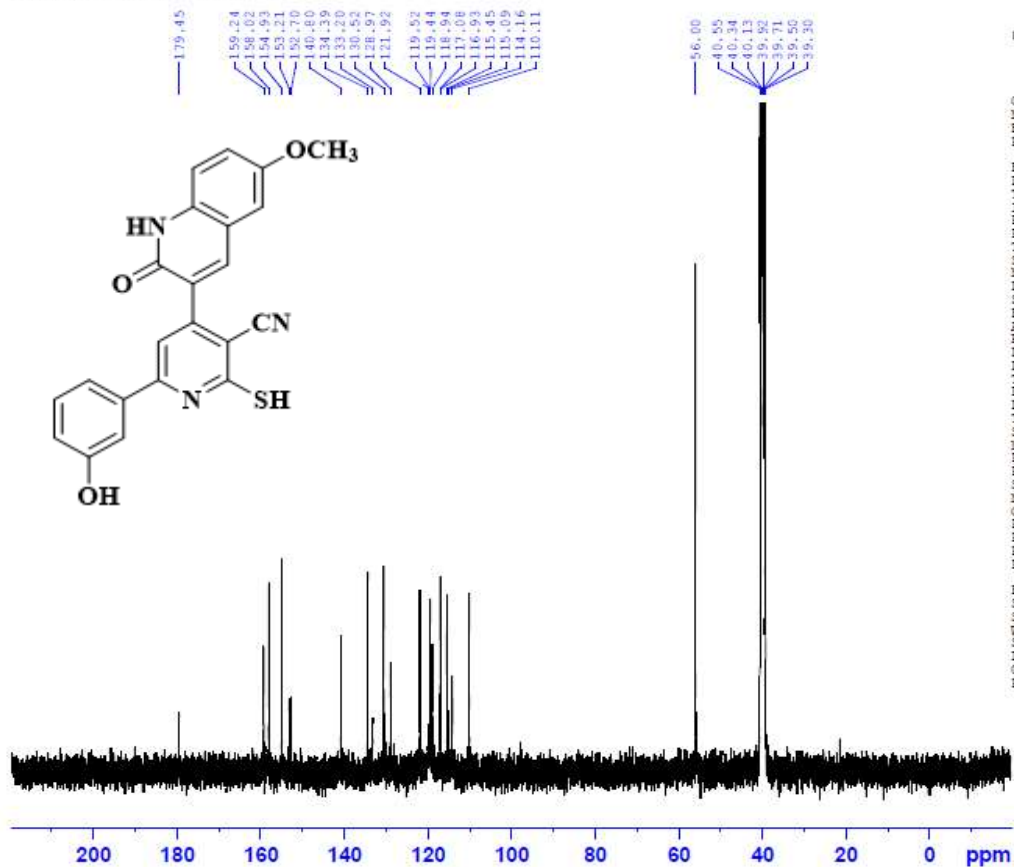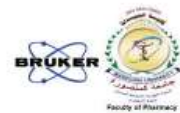

Current Data Parameters  
 NAME Marwa ehab O6 -M carbon  
 EXPNO 10  
 PROCNO 1

F2 - Acquisition Parameters  
 Date\_ 20190109  
 Time 14:33 h  
 INSTRUM spect  
 PROBR 2108618\_0948 (1  
 PULPROG zgpg30  
 TD 65536  
 SOLVENT DMSO  
 NS 1024  
 DS 4  
 SWH 24098.461 Hz  
 FIDRES 0.733596 Hz  
 AQ 1.3621488 sec  
 RG 197.77  
 DW 20.800 usec  
 DE 6.50 usec  
 TE 299.2 K  
 DL 2.00000000 sec  
 DLI 0.03000000 sec  
 TDO 1  
 SFO1 100.6404331 MHz  
 NUC1 13C  
 P1 10.00 usec  
 PLW1 47.00000000 W  
 SFO2 400.2016008 MHz  
 NUC2 1H  
 CPDPRG12 waltz16  
 PCPD2 90.00 usec  
 PLW2 13.00000000 W  
 PLW12 0.29249999 W  
 PLW13 0.14713000 W

F2 - Processing parameters  
 SI 32768  
 SF 100.6202700 MHz  
 WDW EM  
 SSB 0  
 LB 1.00 Hz  
 GB 0  
 PC 1.40

$C^{13}$ -NMR spectra of compound 6c

EX-MARWA-01  
 PROTON\_BSU DMSO {C:\data} nmr 13

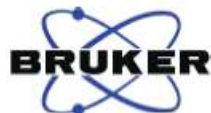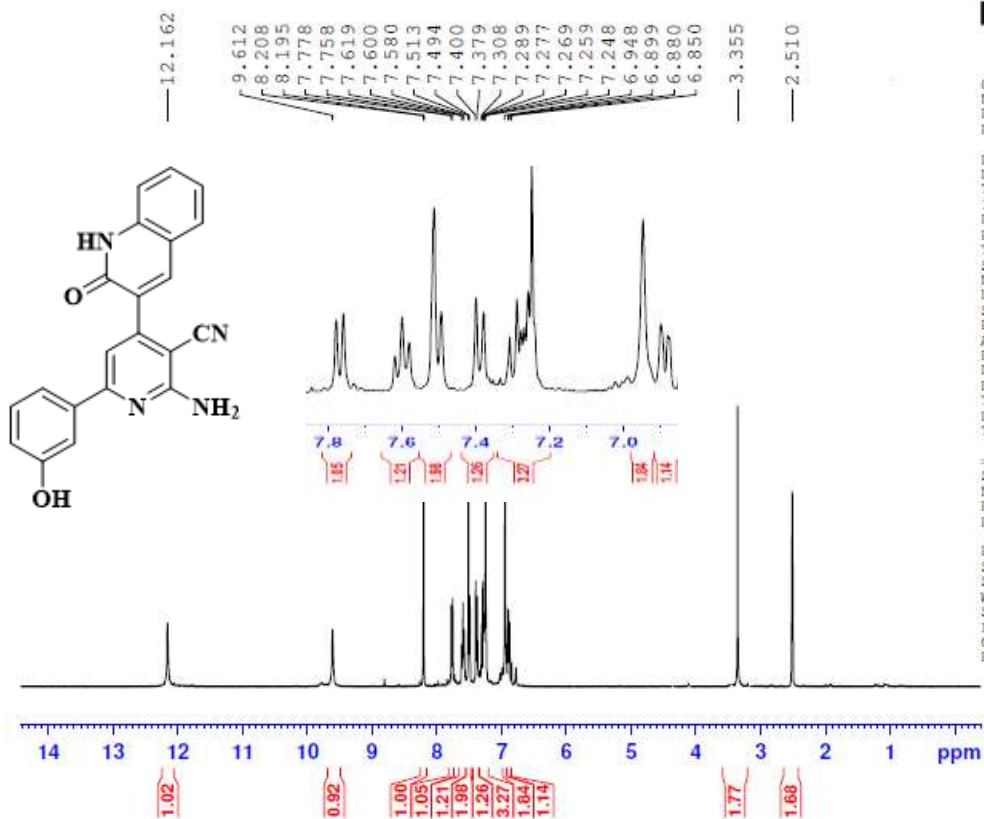

Current Data Parameters  
 NAME Dec24-2017-nmr  
 EXPNO 50  
 PROCNO 1

F2 - Acquisition Parameters  
 Date\_ 20171224  
 Time 10.16  
 INSTRUM spect  
 PROBHD 5 mm PABBO BB/  
 PULPROG zg30  
 TD 65536  
 SOLVENT DMSO  
 NS 16  
 DS 2  
 SWH 8012.820 Hz  
 FIDRES 0.122266 Hz  
 AQ 4.0994465 sec  
 RG 147.93  
 DW 62.400 usec  
 DE 6.50 usec  
 TE 298.1 K  
 D1 1.0000000 sec  
 TD0 1

CHANNEL f1  
 SFO1 400.1324710 MHz  
 NUC1 1H  
 P1 10.00 usec  
 PLW1 16.00000000 W

F2 - Processing parameters  
 SI 65536  
 SF 400.1300000 MHz  
 WDW EM  
 SSB 0  
 LB 0.10 Hz  
 CB 0  
 PC 1.00

### <sup>13</sup>C-NMR spectra of compound 7a

marwa-ehab-o5 #293 RT: 4.92 AV: 1 NL: 1.87E4  
 T: (0,0) + c EI Full ms [40.00-1000.00]

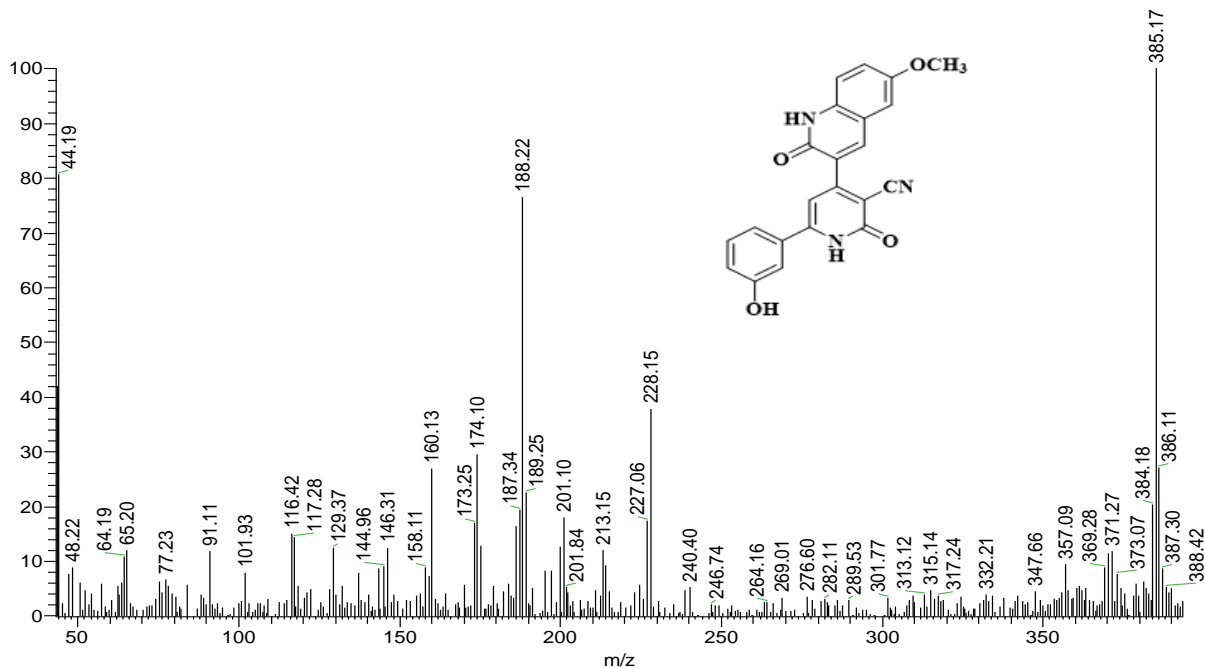

### EI/MS spectrum of compound 5c



marwa-ehab-o3 #229 RT: 3.85 AV: 1 SB: 2 4.55 , 4.59 NL: 2.99E2  
T: (0,0) + c EI Full ms [40.00-1000.00]

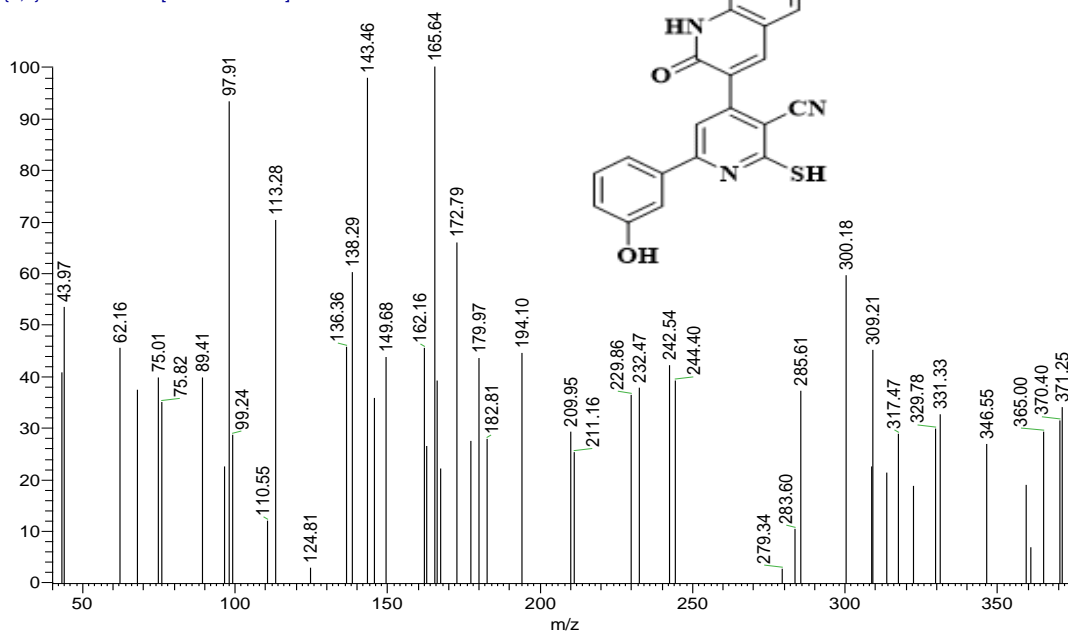

**EI/MS spectrum of compound 6a**

marwa-ehab-o7 #241 RT: 4.05 AV: 1 SB: 2 4.50 , 4.50 NL: 4.67E2  
T: (0,0) + c EI Full ms [40.00-1000.00]

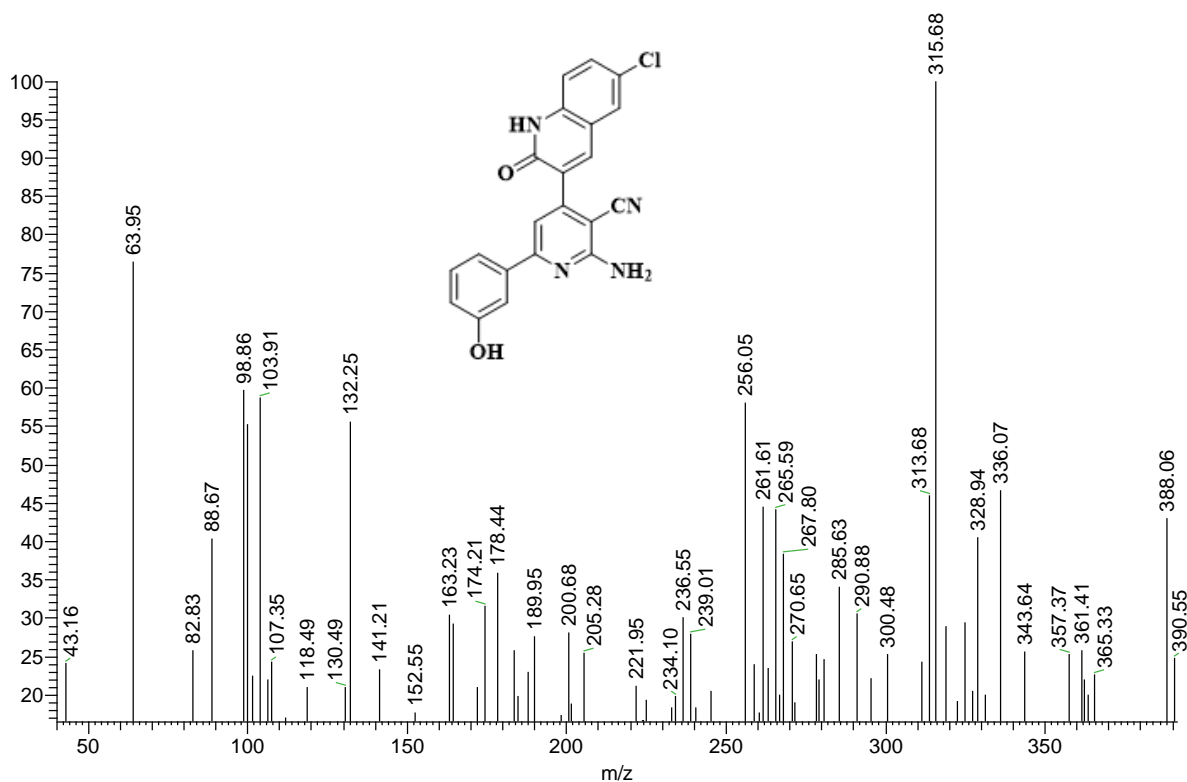

**EI/MS spectrum of compound 7b**

**Al-Azhar University**  
**The Regional Center for Mycology and Biotechnology**

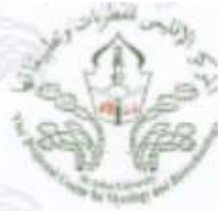

**Requester Data:**

**Name:** Dr. Marwa Ehab Mohamed  
**Authority:** Faculty of Pharmacy,  
Alexandria University

**Sample Data:**

Eleven samples had been submitted for elemental analysis.

**Analysis Report:**

| Sample Code       | C%    | H%   | N%    |
|-------------------|-------|------|-------|
| CH <sub>2</sub>   | 68.01 | 3.43 | 7.79  |
| CH <sub>3</sub>   | 68.56 | 3.88 | 7.42  |
| M <sub>1</sub>    | 71.02 | 4.89 | 13.43 |
| M <sub>4</sub>    | 68.94 | 5.12 | 12.59 |
| M <sub>7</sub>    | 65.27 | 4.28 | 12.47 |
| N <sub>1</sub>    | 74.19 | 5.39 | 13.53 |
| N <sub>4</sub>    | 71.90 | 5.26 | 12.56 |
| N <sub>7</sub>    | 68.60 | 4.80 | 12.49 |
| O <sub>2</sub> 5a | 70.69 | 3.84 | 11.97 |
| O <sub>5</sub> 5c | 68.80 | 3.85 | 10.79 |
| O <sub>8</sub> 5b | 64.89 | 3.32 | 10.85 |

**INVESTIGATOR**

**DIRECTOR**

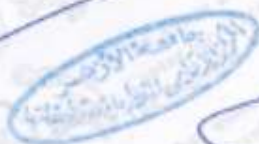

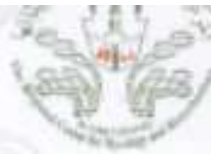

**Requester Data:**

**Name:** Dr. Marwa Ehab Mohamed  
**Authority:** Faculty of Pharmacy,  
Alexandria University

**Sample Data:**

Twenty samples had been submitted for elemental analysis.

**Analysis Report:**

| Sample Code        | C%    | H%   | N%    |
|--------------------|-------|------|-------|
| M <sub>1</sub> cN  | 68.71 | 5.24 | 19.38 |
| M <sub>1</sub> J   | 71.09 | 5.21 | 12.96 |
| M <sub>2</sub>     | 68.42 | 4.75 | 12.94 |
| M <sub>4</sub> e   | 70.38 | 5.84 | 11.50 |
| M <sub>4</sub> k   | 69.87 | 5.68 | 11.79 |
| M <sub>5</sub>     | 66.59 | 4.83 | 11.75 |
| M <sub>7</sub> a   | 64.58 | 4.59 | 11.34 |
| M <sub>7</sub> b   | 62.96 | 4.13 | 11.06 |
| M <sub>7</sub> e   | 67.40 | 5.28 | 11.37 |
| M <sub>7</sub> e N | 63.26 | 4.69 | 17.58 |
| M <sub>7</sub> f   | 63.44 | 4.21 | 11.39 |
| M <sub>7</sub> h   | 66.81 | 4.62 | 11.94 |
| M <sub>7</sub> J   | 66.26 | 4.69 | 11.72 |
| M <sub>7</sub> k   | 66.49 | 4.88 | 11.69 |
| M <sub>8</sub>     | 63.45 | 4.11 | 11.94 |
| N <sub>2</sub>     | 71.47 | 5.28 | 13.02 |
| N <sub>5</sub>     | 69.43 | 5.34 | 12.13 |
| O <sub>1</sub> 7a  | 71.49 | 4.06 | 15.95 |
| O <sub>4</sub> 7c  | 68.95 | 4.32 | 14.67 |
| O <sub>7</sub> 7b  | 64.71 | 3.19 | 14.62 |

INVESTIGATOR

*M. Ehab*

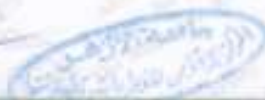

DIRECTOR

*H. Shab*

جامعة الأزهر  
**Al-Azhar University**  
المركز الإقليمي للفطريات وتطبيقاتها  
**The Regional Center for Mycology and Biotechnology**

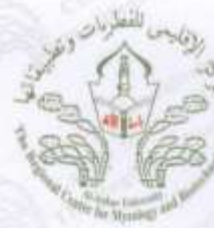

**Requester Data:**

**Name:** Dr. Marwa Ehab Abdel-Aziz  
**Authority:** Faculty of Pharmacy,  
Alexandria University

**Sample Data:**

Nine samples had been submitted for elemental analysis.

**Analysis Report:**

| Sample Code              | C%    | H%   | N%    |
|--------------------------|-------|------|-------|
| M <sub>3</sub>           | 73.68 | 5.12 | 13.89 |
| M <sub>3</sub> r         | 70.69 | 5.23 | 16.75 |
| M <sub>6</sub>           | 71.43 | 5.24 | 12.97 |
| N <sub>3</sub>           | 76.71 | 5.70 | 13.96 |
| N <sub>6</sub>           | 74.52 | 5.68 | 12.59 |
| N <sub>8</sub>           | 65.89 | 4.65 | 11.76 |
| O <sub>3</sub> <b>6a</b> | 67.69 | 3.75 | 11.48 |
| O <sub>6</sub> <b>6c</b> | 65.70 | 3.98 | 10.60 |
| O <sub>9</sub> <b>6b</b> | 62.41 | 3.16 | 10.44 |

INVESTIGATOR

Mr. Elsayed

DIRECTOR

(Dr. S. El-Sayed)

**Table 1: Anticancer activities IC<sub>50</sub> (μM) of the tested compounds against human cancer cells, In vitro cytotoxicity and selectivity index (SI) values of the tested compounds.**

| Cpd No    | Wi-38                 |                        | HepG-2                |        | Caco-2                |        | PC-3                  |        | NFS-60                |        |
|-----------|-----------------------|------------------------|-----------------------|--------|-----------------------|--------|-----------------------|--------|-----------------------|--------|
|           | EC <sub>50</sub> (μM) | EC <sub>100</sub> (μM) | IC <sub>50</sub> (μM) | SI     | IC <sub>50</sub> (μM) | SI     | IC <sub>50</sub> (μM) | SI     | IC <sub>50</sub> (μM) | SI     |
| <b>5a</b> | 0.0603±0.04           | 0.0192±0.003           | 0.0344±0.006          | 1.753  | 0.0388±0.008          | 1.554  | 0.0716±0.0.4          | 0.842  | 0.03162±0.0001        | 1.907  |
| <b>5b</b> | 0.171±0.002           | 0.048±0.0001           | <b>0.00528±0.0001</b> | 32.386 | <b>0.0453±0.001</b>   | 3.775  | <b>0.0261±0.004</b>   | 6.552  | <b>0.00932±0.004</b>  | 18.348 |
| <b>5c</b> | 0.717±0.002           | 0.361±0.014            | <b>0.0076±0.0001</b>  | 94.342 | <b>0.0361±0.0001</b>  | 19.861 | <b>0.0272±0.003</b>   | 26.360 | <b>0.0181±0.001</b>   | 39.613 |
| <b>5d</b> | 0.0299±0.0001         | 0.0239±0.0003          | 0.0897±0.013          | 0.333  | 0.0386±0.001          | 0.775  | 0.05341±0.004         | 0.560  | 0.07126±0.003         | 0.420  |
| <b>5e</b> | 0.0276±0.001          | 0.0234±0.001           | 0.03612±0.001         | 0.764  | 0.0517±0.005          | 0.534  | 0.0409±0.001          | 0.675  | 0.06267±0.027         | 0.440  |
| <b>5f</b> | 0.0298±0.002          | 0.0258±0.008           | 0.0378±0.01           | 0.788  | 0.0508±0.004          | 0.587  | 0.0451±0.0001         | 0.661  | 0.04283±0.0003        | 0.696  |
| <b>6a</b> | 0.181±0.005           | 0.0785±0.003           | 0.074±0.002           | 2.446  | 0.104±0.004           | 1.740  | 0.127±0.002           | 1.425  | 0.135±0.002           | 1.341  |
| <b>6b</b> | 0.138±0.002           | 0.0493±0.001           | 0.0466±0.001          | 2.961  | 0.0552±0.003          | 2.500  | 0.119±0.014           | 1.160  | 0.204±0.006           | 0.676  |
| <b>6c</b> | 0.376±0.001           | 0.177±0.011            | 0.0848±0.002          | 4.434  | 0.0999±0.003          | 3.764  | 0.1008±0.0001         | 3.730  | 0.145±0.015           | 2.593  |
| <b>6d</b> | 0.759±0.025           | 0.212±0.009            | 0.0876±0.002          | 8.664  | 0.0708±0.003          | 10.720 | 0.135±0.011           | 5.622  | 0.217±0.022           | 3.498  |
| <b>6e</b> | 0.155±0.003           | 0.0277±0.0001          | <b>0.0122±0.0001</b>  | 12.705 | <b>0.027±0.002</b>    | 5.741  | <b>0.0429±0.003</b>   | 3.613  | <b>0.0539±0.0001</b>  | 2.876  |
| <b>7a</b> | 0.174±0.005           | 0.102±0.01             | 0.0495±0.0001         | 3.515  | 0.0799±0.003          | 2.178  | 0.140±0.02            | 1.243  | 0.145±0.002           | 1.200  |
| <b>7b</b> | 0.140±0.009           | 0.110±0.002            | 0.1016±0.001          | 1.378  | 0.119±0.016           | 1.176  | 0.135±0.002           | 1.037  | 0.107±0.001           | 1.308  |
| <b>7c</b> | 0.137±0.0001          | 0.094±0.005            | 0.1421±0.001          | 0.964  | 0.127±0.014           | 1.079  | 0.101±0.001           | 1.356  | 0.153±0.034           | 0.895  |
| <b>9a</b> | 0.159±0.004           | 0.0254±0.002           | 0.0782±0.002          | 2.033  | 0.0739±0.0001         | 2.152  | 0.0847±0.003          | 1.877  | 0.0923±0.0001         | 1.723  |
| <b>9b</b> | 0.171±0.001           | 0.134±0.01             | 0.0454±0.003          | 3.767  | 0.0552±0.002          | 3.098  | 0.0973±0.008          | 1.757  | 0.380±0.01            | 0.450  |
| <b>9c</b> | 0.276±0.002           | 0.0754±0.003           | 0.0867±0.003          | 3.183  | 0.0526±0.0001         | 5.247  | 0.0462±0.002          | 5.974  | 0.0961±0.002          | 2.872  |

| Cpd No     | Wi-38                       |                              | HepG-2                      |        | Caco-2                      |        | PC-3                        |        | NFS-60                      |        |
|------------|-----------------------------|------------------------------|-----------------------------|--------|-----------------------------|--------|-----------------------------|--------|-----------------------------|--------|
|            | EC <sub>50</sub> ( $\mu$ M) | EC <sub>100</sub> ( $\mu$ M) | IC <sub>50</sub> ( $\mu$ M) | SI     | IC <sub>50</sub> ( $\mu$ M) | SI     | IC <sub>50</sub> ( $\mu$ M) | SI     | IC <sub>50</sub> ( $\mu$ M) | SI     |
| <b>11a</b> | 0.144±0.001                 | 0.0906±0.012                 | 0.336±0.022                 | 0.429  | 0.158±0.002                 | 0.911  | 0.158±0.026                 | 0.911  | 0.126±0.006                 | 1.143  |
| <b>11b</b> | 0.337±0.024                 | 0.00232±0.001                | 0.0715±0.001                | 4.713  | 0.063±0.002                 | 5.349  | 0.130±0.011                 | 2.592  | 0.181±0.007                 | 1.862  |
| <b>11c</b> | 0.101±0.001                 | 0.0483±0.004                 | 0.281±0.007                 | 0.359  | 0.100±0.014                 | 1.010  | 0.159±0.007                 | 0.635  | 0.110±0.002                 | 0.918  |
| <b>11d</b> | 0.107±0.001                 | 0.0455±0.002                 | 0.0458±0.001                | 2.336  | 0.0521±0.002                | 2.054  | 0.0594±0.001                | 1.801  | 0.0927±0.0001               | 1.154  |
| <b>11e</b> | 0.085±0.003                 | 0.0178±0.0001                | 0.0416±0.004                | 2.043  | 0.0311±0.006                | 2.733  | 0.0444±0.004                | 1.914  | 0.0532±0.002                | 1.598  |
| <b>11f</b> | 0.181±0.013                 | 0.0347±0.003                 | 0.0363±0.001                | 4.986  | 0.0344±0.003                | 5.262  | 0.0476±0.0001               | 3.803  | 0.0998±0.011                | 1.814  |
| <b>11g</b> | 0.186±0.01                  | 0.0450±0.005                 | 0.0628±0.001                | 2.962  | 0.0626±0.001                | 2.971  | 0.0839±0.003                | 2.217  | 0.103±0.009                 | 1.806  |
| <b>11h</b> | 0.166±0.003                 | 0.0182±0.001                 | 0.074±0.002                 | 2.243  | 0.0829±0.003                | 2.002  | 0.0709±0.0001               | 2.341  | 0.0781±0.007                | 2.125  |
| <b>11i</b> | 0.258±0.031                 | 0.148±0.0001                 | 0.0486±0.001                | 5.309  | 0.0347±0.003                | 7.435  | 0.0634±0.002                | 4.069  | 0.523±0.04                  | 0.493  |
| <b>13a</b> | 0.0255±0.004                | 0.0145±0.0001                | <b>0.00238±0.0001</b>       | 10.714 | <b>0.0228±0.001</b>         | 1.118  | <b>0.0200±0.003</b>         | 1.275  | <b>0.009±0.0001</b>         | 2.833  |
| <b>13b</b> | 0.0486±0.016                | 0.017±0.002                  | 0.0309±0.001                | 1.573  | 0.04836±0.005               | 1.005  | 0.0388±0.003                | 1.253  | 0.03373±0.002               | 1.441  |
| <b>13c</b> | 0.0348±0.003                | 0.0242±0.001                 | <b>0.00377±0.0001</b>       | 9.231  | <b>0.0337±0.006</b>         | 1.033  | <b>0.0225±0.002</b>         | 1.547  | <b>0.0088±0.0001</b>        | 3.955  |
| <b>14a</b> | 0.299±0.004                 | 0.134±0.003                  | <b>0.0127±0.003</b>         | 23.543 | <b>0.0141±0.004</b>         | 21.206 | <b>0.0168±0.0001</b>        | 17.798 | <b>0.0232±0.002</b>         | 12.888 |
| <b>14b</b> | 0.196±0.012                 | 0.153±0.005                  | 0.125±0.002                 | 1.568  | 0.146±0.019                 | 1.342  | 0.140±0.004                 | 1.400  | 0.135±0.003                 | 1.452  |
| <b>14c</b> | 0.166±0.009                 | 0.0972±0.005                 | 0.0557±0.003                | 2.980  | 0.0842±0.005                | 1.971  | 0.0626±0.0001               | 2.652  | 0.0965±0.004                | 1.720  |
| <b>15a</b> | 0.202±0.003                 | 0.0663±0.003                 | 0.108±0.007                 | 1.870  | 0.191±0.019                 | 1.058  | 0.242±0.037                 | 0.835  | 0.247±0.016                 | 0.818  |
| <b>15b</b> | 0.264±0.006                 | 0.169±0.009                  | 0.299±0.008                 | 0.883  | 0.194±0.002                 | 1.361  | 0.196±0.061                 | 1.347  | 0.323±0.007                 | 0.817  |
| <b>15c</b> | 0.121±0.002                 | 0.101±0.005                  | 0.107±0.011                 | 1.131  | 0.141±0.021                 | 0.858  | 0.143±0.013                 | 0.846  | 0.122±0.001                 | 0.992  |
| <b>11a</b> | 0.144±0.001                 | 0.0906±0.012                 | 0.336±0.022                 | 0.429  | 0.158±0.002                 | 0.911  | 0.158±0.026                 | 0.911  | 0.126±0.006                 | 1.143  |
| <b>11b</b> | 0.337±0.024                 | 0.00232±0.001                | 0.0715±0.001                | 4.713  | 0.063±0.002                 | 5.349  | 0.130±0.011                 | 2.592  | 0.181±0.007                 | 1.862  |
| <b>11c</b> | 0.101±0.001                 | 0.0483±0.004                 | 0.281±0.007                 | 0.359  | 0.100±0.014                 | 1.010  | 0.159±0.007                 | 0.635  | 0.110±0.002                 | 0.918  |
| <b>11d</b> | 0.107±0.001                 | 0.0455±0.002                 | 0.0458±0.001                | 2.336  | 0.0521±0.002                | 2.054  | 0.0594±0.001                | 1.801  | 0.0927±0.0001               | 1.154  |

### ***Cytotoxicity screening***

Cytotoxicity of the tested compounds was evaluated using normal human lung fibroblast Wi-38 cell line compared to currently used anticancer drug (doxorubicin). Firstly, Wi-38 cell line was subcultured in DMEM medium-contained 10% fetal bovine serum (FBS), then, seeded as  $5 \times 10^3$  cells per well in 96-well cell culture plate and incubated at 37°C in 5% CO<sub>2</sub> incubator. Serial concentrations of these compounds and doxorubicin (Dox) were incubated with Wi-38 cells for 72 h after 24 h for cell attachment. MTT method was used for assaying cell viability<sup>25</sup>. Twenty microliters of 5 mg/ml MTT (Sigma, USA) was added to each well and the plate was incubated at 37°C for 3 h. Then MTT solution was removed, 100 µl DMSO was used and the absorbance of each well was measured with a microplate reader (BMG LabTech, Germany) at 570 nm. The effective concentration (IC<sub>50</sub>) and safe dose (EC<sub>100</sub>) values of the tested compounds that cause 50% and 100% cell viability were estimated by the Graphpad Instat software.

### ***Determination of the anticancer activity***

Anticancer effect of the above-mentioned compounds was evaluated using four human cancer cell lines. Colon cancer cells (Caco-2) were maintained in DMEM (Lonza, USA) containing 10% FBS while myeloid leukemia cell line (NFS-60), liver cancer cell line (HepG-2) and prostate cancer cell line (PC-3) were cultured in RPMI-1640 (Lonza, USA) supplemented with 10% FBS. All cancer cells ( $5 \times 10^3$  cells/well) were seeded in sterile 96-well plates. After 24h, serial concentrations of the tested compounds and Dox were incubated with four cancer cell lines for 72 h at 37°C in 5% CO<sub>2</sub> incubator. MTT method was done as described above. The Graphpad Instat software was used for calculating the half maximal inhibitory concentration (IC<sub>50</sub>) values. Furthermore, phase contrast inverted microscope with a digital camera (Olympus, Japan) was used for investigating cellular morphological changes before and after treatment with the most effective and safest anticancer compounds.

### ***Flow cytometric analysis of apoptosis***

The IC<sub>50</sub> of the most effective compounds and Dox was incubated for 72 h with HepG2, Caco-2, PC-3 and NFS-60 cell lines. After trypsinization, the untreated and treated cells were incubated with annexin V/PI for 15 min. Then cells were fixed and incubated with streptavidin-fluorescein (5 µg/mL) for 15 min. The apoptosis-dependent anticancer effect was determined by quantification of annexin-stained apoptotic cells using the FITC signal detector (FL1) against the phycoerythrin emission signal detector (FL2).

### ***Caspase 3/7 activation assay***

The Apo-ONE<sup>®</sup> caspase 3/7 kit following the manufacturer's instructions was used for quantifying the percentage of caspase 3/7 activation. The fluorescence substrate present in the kit was cut by caspases to produce fluorescence signal. This signal was measured by the fluorescence omega microplate reader (BMG LabTech, Germany) at 490 nm excitation and 520 nm emission.

### ***Statistical Analysis***

Data were expressed as mean  $\pm$  standard error of the mean (SEM). Statistical significance was estimated by the multiple comparisons Tukey post-hoc analysis of variance (ANOVA) using the SPSS16 program. When  $p < 0.05$ , the differences were marked as statistically significant.

### ***PIM-1 and PIM-2 kinase inhibitory activity***

The most active anticancer compounds were tested for their ability to *in-vitro* inhibit PIM-1 and PIM-2 kinase utilizing PIM-1 and PIM-2 Kinase Assay Kit – Promega Corporation catalog #V4032, following the manufacturer's instructions<sup>26</sup>
